# Supplementary material
Source: HighWire-hosted journal article supplement (https://bmjmedicine.bmj.com/highwire/filestream/269/field_highwire_adjunct_files/2/bmjmed-2022-000247supp003_data_supplement.pdf)
Supplement: bmjmed-2022-000247supp003_data_supplement.pdf [file bmjmed-2022-000247supp003_data_supplement.pdf]

## Measuring multimorbidity in research: a Delphi consensus study

### Appendix 3

#### Table of Contents

|                                                                                                                                                                                              |    |
|----------------------------------------------------------------------------------------------------------------------------------------------------------------------------------------------|----|
| Figure S1: Criteria for defining consensus of items .....                                                                                                                                    | 2  |
| Box 1: Rasch Model used for sensitivity analysis.....                                                                                                                                        | 3  |
| Table S1: Characteristics of non-respondents and unidentified panelists .....                                                                                                                | 4  |
| Table S2: Responses to questions on conceptualising multimorbidity .....                                                                                                                     | 6  |
| Figure S2: Type of conditions to include when defining multimorbidity.....                                                                                                                   | 8  |
| Table S3: Defining “condition” in the concept of multimorbidity (based on participant free-text comments, questions changed from round to round) .....                                       | 9  |
| Table S4: Consideration of conditions to include based on impact (based on participant free-text comments, questions changed from round to round) .....                                      | 10 |
| Table S5: Responses to questions relevant to weighting (based on participant free-text comments, questions changed from round to round) .....                                                | 11 |
| Table S6: Professional ratings for choice of simple counts vs weighted measures depending on the purpose of a study .....                                                                    | 13 |
| Table S7: Professional ratings for choice of simple counts vs weighted measures for outcome prediction depending on the outcome being measured .....                                         | 14 |
| Table S8: Professional scores for ‘always include’ .....                                                                                                                                     | 15 |
| Table S9: Public scores for ‘always include’ .....                                                                                                                                           | 17 |
| Table S10: Professional scores for ‘usually include’ (the sum of ‘always’ and ‘usually’).....                                                                                                | 19 |
| Table S11: Public scores for ‘usually include’ (the sum of ‘always’ and ‘usually’).....                                                                                                      | 21 |
| Table S12: Conditions not recommended to ‘always include’ or ‘usually include’ by both panels.                                                                                               | 23 |
| Table S13: Differential item functioning (used to examine which condition-choice items were more likely to be endorsed by panelists with varying interest in different populations [4])..... | 24 |
| Table S14: Level of endorsement of the condition-related items .....                                                                                                                         | 26 |
| References .....                                                                                                                                                                             | 30 |

Figure S1: Criteria for defining consensus of items

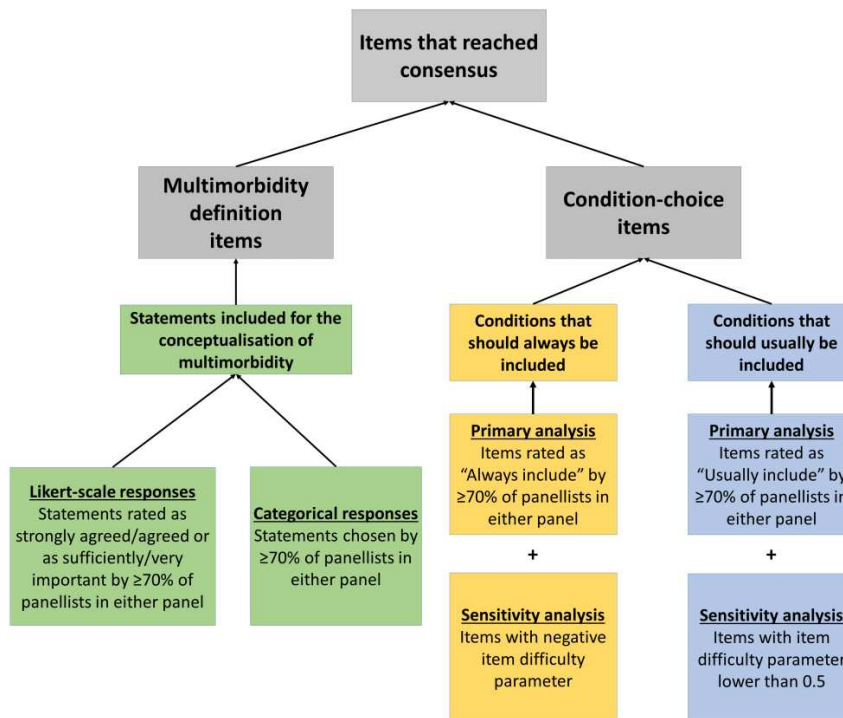

**Box 1: Rasch Model used for sensitivity analysis**

The Rasch dichotomous model is an item response theory model with one item parameter [1]. We used Rasch modelling to examine the degree to which condition-relevant items were endorsed by panelists. The common feature in the Rasch model is conditional maximum likelihood estimation which leads to the separability of item and person parameters [2]. Item discrimination (the level of endorsement varies with person ability) in the Rasch analysis is fixed for all items [3].

The mathematical form of the Rasch dichotomous model is given as follows [1, 3]:

$$P(X_{is} = 1 | \theta_s, \beta_i) = \frac{e^{\theta_s - \beta_i}}{1 + e^{\theta_s - \beta_i}}$$

$X_{is}$  refers to response ( $X$ ) made by subject  $s$  to item  $i$ .

$X_{is} = 1$  refers to an endorsement of the item

$\beta_i$  refers to the difficulty of item  $i$

$\theta$  refers to person's trait/ability

To estimate the trait level, we can take the natural log of a ratio of proportion endorsed responses to proportion unendorsed responses:

$$\theta = \ln(P_s / (1 - P_s))$$

To estimate item difficulty, we can take the natural log of a ratio of proportion unendorsed responses to proportion endorsed responses.

$$\beta = \ln(1 - P_s / P_s)$$

**Table S1: Characteristics of non-respondents and unidentified panelists†**

| Characteristics                              | Professional round one participant who did not respond or could not be tracked in round two (n=42) <sup>a</sup><br>No (%) | Professional round two participant who did not respond in round three Professional round two (n=15) <sup>b</sup><br>No (%) | Public round one participant who did not respond or could not be tracked in round two (n=10) <sup>c</sup><br>No (%) | Public round two participant who did not respond or could not be tracked in round three (n=7) <sup>d</sup><br>No (%) |
|----------------------------------------------|---------------------------------------------------------------------------------------------------------------------------|----------------------------------------------------------------------------------------------------------------------------|---------------------------------------------------------------------------------------------------------------------|----------------------------------------------------------------------------------------------------------------------|
| <b>Continent</b>                             |                                                                                                                           |                                                                                                                            |                                                                                                                     |                                                                                                                      |
| Europe                                       | 24 (57.1%)                                                                                                                | 9 (60.0%)                                                                                                                  | 7 (70.0%)                                                                                                           | 7 (100.0%)                                                                                                           |
| North America                                | 7 (16.7%)                                                                                                                 | 2 (13.3%)                                                                                                                  | 1 (10.0%)                                                                                                           | 0                                                                                                                    |
| Australasia                                  | 1 (2.4%)                                                                                                                  | 2 (13.3%)                                                                                                                  | 0                                                                                                                   | 0                                                                                                                    |
| Asia                                         | 9 (21.4%)                                                                                                                 | 1 (6.7%)                                                                                                                   | 1 (10.0%)                                                                                                           | 0                                                                                                                    |
| South America                                | 1 (2.4%)                                                                                                                  | 0                                                                                                                          | 0                                                                                                                   | 0                                                                                                                    |
| Africa                                       | 0                                                                                                                         | 1 (6.7%)                                                                                                                   | 0                                                                                                                   | 0                                                                                                                    |
| Not stated                                   | 0                                                                                                                         | 0                                                                                                                          | 1 (10.0%)                                                                                                           | 0                                                                                                                    |
| <b>Country income</b>                        |                                                                                                                           |                                                                                                                            |                                                                                                                     |                                                                                                                      |
| High-income                                  | 39 (92.9%)                                                                                                                | 14 (93.3%)                                                                                                                 | 8 (80.0%)                                                                                                           | 7 (100.0%)                                                                                                           |
| Low and middle income                        | 3 (7.1%)                                                                                                                  | 1 (6.7%)                                                                                                                   | 1 (10.0%)                                                                                                           | 0                                                                                                                    |
| Not stated                                   | 0                                                                                                                         | 0                                                                                                                          | 1 (10.0%)                                                                                                           | 0                                                                                                                    |
| <b>Participant has multimorbidity</b>        |                                                                                                                           |                                                                                                                            |                                                                                                                     |                                                                                                                      |
| Yes                                          | 2 (4.8%)                                                                                                                  | 3 (20.0%)                                                                                                                  | 13 (52.0%)                                                                                                          | 19 (61.3%)                                                                                                           |
| No                                           | 40 (95.2%)                                                                                                                | 12 (80.0%)                                                                                                                 | 12 (48.0%)                                                                                                          | 12 (38.7%)                                                                                                           |
| Not stated                                   | 0                                                                                                                         | 0                                                                                                                          | 0                                                                                                                   | 0                                                                                                                    |
| <b>Family or friends have multimorbidity</b> |                                                                                                                           |                                                                                                                            |                                                                                                                     |                                                                                                                      |
| Yes                                          | 28 (66.7%)                                                                                                                | 10 (66.7%)                                                                                                                 | 6 (60.0%)                                                                                                           | 5 (71.4%)                                                                                                            |
| No                                           | 14 (33.3%)                                                                                                                | 5 (33.3%)                                                                                                                  | 4 (40.0%)                                                                                                           | 2 (28.6%)                                                                                                            |
| <b>Type of work*</b>                         |                                                                                                                           |                                                                                                                            |                                                                                                                     |                                                                                                                      |
| Research                                     | 31 (73.8%)                                                                                                                | 13 (86.7%)                                                                                                                 | -                                                                                                                   | -                                                                                                                    |
| Public policy                                | 4 (9.5%)                                                                                                                  | 2 (13.3%)                                                                                                                  | -                                                                                                                   | -                                                                                                                    |
| Clinical practice                            | 16 (38.1%)                                                                                                                | 4 (26.7%)                                                                                                                  | -                                                                                                                   | -                                                                                                                    |
| Teaching                                     | 2 (4.8%)                                                                                                                  | 0                                                                                                                          | -                                                                                                                   | -                                                                                                                    |
| <b>Main work setting</b>                     |                                                                                                                           |                                                                                                                            |                                                                                                                     |                                                                                                                      |
| Government                                   | 4 (9.5%)                                                                                                                  | 0                                                                                                                          | -                                                                                                                   | -                                                                                                                    |
| Academia                                     | 26 (61.9%)                                                                                                                | 13 (86.7%)                                                                                                                 | -                                                                                                                   | -                                                                                                                    |
| Hospital                                     | 2 (4.8%)                                                                                                                  | 0                                                                                                                          | -                                                                                                                   | -                                                                                                                    |
| Primary care                                 | 10 (23.8%)                                                                                                                | 2 (13.3%)                                                                                                                  | -                                                                                                                   | -                                                                                                                    |
| Other                                        | 0                                                                                                                         | 0                                                                                                                          | -                                                                                                                   | -                                                                                                                    |
| <b>Populations of interest*</b>              |                                                                                                                           |                                                                                                                            |                                                                                                                     |                                                                                                                      |
| General population                           | 27 (64.3%)                                                                                                                | 11 (73.3%)                                                                                                                 | -                                                                                                                   | -                                                                                                                    |
| Older people                                 | 29 (69.0%)                                                                                                                | 7 (46.7%)                                                                                                                  | -                                                                                                                   | -                                                                                                                    |
| Middle-aged and older                        | 26 (61.9%)                                                                                                                | 6 (40.0%)                                                                                                                  | -                                                                                                                   | -                                                                                                                    |
| Socially-deprived population                 | 23 (54.8%)                                                                                                                | 6 (40.0%)                                                                                                                  | -                                                                                                                   | -                                                                                                                    |
| Women                                        | 10 (23.8%)                                                                                                                | 2 (13.3%)                                                                                                                  | -                                                                                                                   | -                                                                                                                    |
| Men                                          | 10 (23.8%)                                                                                                                | 1 (6.7%)                                                                                                                   | -                                                                                                                   | -                                                                                                                    |
| Children                                     | 5 (11.9%)                                                                                                                 | 1 (6.7%)                                                                                                                   | -                                                                                                                   | -                                                                                                                    |
| Ethnic minority/indigenous                   | 1 (2.4%)                                                                                                                  | 3 (20.0%)                                                                                                                  | -                                                                                                                   | -                                                                                                                    |
| People with disability                       | 0                                                                                                                         | 2 (13.3%)                                                                                                                  | -                                                                                                                   | -                                                                                                                    |
| <b>Age group</b>                             |                                                                                                                           |                                                                                                                            |                                                                                                                     |                                                                                                                      |
| 18-34                                        | -                                                                                                                         | -                                                                                                                          | 1 (10.0%)                                                                                                           | 0                                                                                                                    |
| 35-54                                        | -                                                                                                                         | -                                                                                                                          | 2 (20.0%)                                                                                                           | 2 (28.6%)                                                                                                            |
| 55-64                                        | -                                                                                                                         | -                                                                                                                          | 3 (30.0%)                                                                                                           | 1 (14.3%)                                                                                                            |
| ≥65                                          | -                                                                                                                         | -                                                                                                                          | 4 (40.0%)                                                                                                           | 4 (57.1%)                                                                                                            |

| Characteristics | Professional round one participant who did not respond or could not be tracked in round two (n=42) <sup>a</sup><br>No (%) | Professional round two participant who did not respond in round three Professional round two (n=15) <sup>b</sup><br>No (%) | Public round one participant who did not respond or could not be tracked in round two (n=10) <sup>c</sup><br>No (%) | Public round two participant who did not respond or could not be tracked in round three (n=7) <sup>d</sup><br>No (%) |
|-----------------|---------------------------------------------------------------------------------------------------------------------------|----------------------------------------------------------------------------------------------------------------------------|---------------------------------------------------------------------------------------------------------------------|----------------------------------------------------------------------------------------------------------------------|
| <b>Gender</b>   |                                                                                                                           |                                                                                                                            |                                                                                                                     |                                                                                                                      |
| Female          | -                                                                                                                         | -                                                                                                                          | 4 (40.0%)                                                                                                           | 6 (85.7%)                                                                                                            |
| Male            | -                                                                                                                         | -                                                                                                                          | 6 (60.0%)                                                                                                           | 1 (14.3%)                                                                                                            |

‡“Unidentified panelists” is defined as “panelists who did not provide their email or preferred name in the previous and following rounds”. Some who dropped out in the following round did not provide their email and preferred name either. Thus, they were in the pool of those who either dropped out or cannot be identified”. As we couldn’t distinguish these two groups in the pool, we reported the characteristics of the two groups together.

\*multiple select question

a. The 42 panelists consist of 38 who dropped out in round 2, and 4 are unidentified.

b. The 15 non-respondents in round 2

c. The 10 panelists consist of 6 who dropped out in round 2 and 4 are unidentified

d. The 7 panelists consist of 6 who dropped out in round 3 and 1 are unidentified

Table S2: Responses to questions on conceptualising multimorbidity

| Question                                                                                                               | Choice                                                                                              | Professional panel |                    |                   | Public panel      |                   |                   |
|------------------------------------------------------------------------------------------------------------------------|-----------------------------------------------------------------------------------------------------|--------------------|--------------------|-------------------|-------------------|-------------------|-------------------|
|                                                                                                                        |                                                                                                     | Round 1<br>(n=150) | Round 2<br>(n=112) | Round 3<br>(n=97) | Round 1<br>(n=25) | Round 2<br>(n=31) | Round 3<br>(n=25) |
| Number of conditions to define multimorbidity                                                                          | <b>2 or more</b>                                                                                    | 68.3%              | <b>84.8%</b>       | -                 | <b>88.0%</b>      | -                 | -                 |
|                                                                                                                        | 3 or more                                                                                           | 29.3%              | 12.5%              |                   | 8.0%              |                   |                   |
|                                                                                                                        | 4 or more                                                                                           | 1.3%               | 0.9%               |                   | 0                 |                   |                   |
|                                                                                                                        | 5 or more                                                                                           | 0.7%               | 0                  |                   | 4.0%              |                   |                   |
|                                                                                                                        | Other                                                                                               | 0.7%               | 1.8%               |                   | 0                 |                   |                   |
| How long-term a condition should be                                                                                    | 3 months or more                                                                                    | 16.7%              | 3.6%               | -                 | 8.0%              | -                 | -                 |
|                                                                                                                        | <b>6 months or more</b>                                                                             | 42.7%              | <b>70.5%</b>       |                   | 8.0%              |                   |                   |
|                                                                                                                        | <b>12 months or more</b>                                                                            | 33.3%              | 23.2%              |                   | <b>76.0%</b>      |                   |                   |
|                                                                                                                        | Other                                                                                               | 7.3%               | 2.7%               |                   | 8.0%              |                   |                   |
| Do you agree that defining complex multimorbidity in addition to a core definition of simple multimorbidity is useful? | <b>Strongly agree</b>                                                                               | -                  | <b>36.4%</b>       | <b>60.4%</b>      | -                 | <b>33.3%</b>      | <b>36.0%</b>      |
|                                                                                                                        | <b>Agree</b>                                                                                        |                    | <b>32.7%</b>       | <b>27.1%</b>      |                   | <b>53.3%</b>      | <b>48.0%</b>      |
|                                                                                                                        | Neither agree nor disagree                                                                          |                    | 9.1%               | 4.2%              |                   | 3.3%              | 4.0%              |
|                                                                                                                        | Disagree                                                                                            |                    | 15.5%              | 5.2%              |                   | 6.7%              | 4.0%              |
|                                                                                                                        | Strongly disagree                                                                                   |                    | 6.4%               | 3.1%              |                   | 3.3%              | 8.0%              |
| How would you define complex multimorbidity based on number of conditions?                                             | 3 or more conditions irrespective of how many body systems                                          | -                  | 17.9%              | 25.8%             | -                 | 41.9%             | <b>76.0%</b>      |
|                                                                                                                        | 3 or more conditions from two or more body systems                                                  |                    | 29.5%              | 33.0%             |                   | 16.1%             | 12.0%             |
|                                                                                                                        | 3 or more conditions from three or more body systems                                                |                    | 14.3%              | 26.8%             |                   | 19.4%             | 12.0%             |
|                                                                                                                        | 4 or more conditions irrespective of how many body systems                                          |                    | 6.3%               | 3%                |                   | 9.7%              | 0                 |
|                                                                                                                        | 4 or more conditions four or more body systems                                                      |                    | 1.8%               | 0                 |                   | 0                 | 0                 |
|                                                                                                                        | 4 or more conditions four or more body systems                                                      |                    | 3.6%               | 0                 |                   | 0                 | 0                 |
|                                                                                                                        | 5 or more conditions irrespective of how many body systems                                          |                    | 1.8%               | 0                 |                   | 0                 | 0                 |
| 5 or more conditions five or more body systems                                                                         |                                                                                                     | 25.0%              | 11.3%              |                   | 12.9%             | 0                 |                   |
| Other patterns I would like to include in the definition of complex multimorbidity*                                    | No other patterns that I would like to include                                                      | -                  | 29.5%              | 22.7%             | -                 | 16.1%             | 20.0%             |
|                                                                                                                        | Any combination of two or more conditions which includes both physical and mental health conditions |                    | 36.6%              | 33.0%             |                   | 64.5%             | 44.0%             |
|                                                                                                                        | Any combination of two or more conditions with significantly physical functional limitation         |                    | 0                  | 30.9%             |                   | 0                 | 32.0%             |
|                                                                                                                        | Difficulty in managing illnesses due to social factors/social determinants of health                |                    | 0                  | 26.8%             |                   | 0                 | 28.0%             |
|                                                                                                                        | Any combination of two or more conditions and frailty                                               |                    | 0                  | 25.8%             |                   | 0                 | 12.0%             |
| What kind of conditions to include*                                                                                    | <b>Formal medical diagnosis</b>                                                                     | <b>98.7%</b>       | <b>99.1%</b>       | -                 | <b>96.0%</b>      | <b>96.8%</b>      | -                 |
|                                                                                                                        | <b>Clinical risk factor</b>                                                                         | 54.0%              | 49.1%              |                   | 60.0%             | <b>74.2%</b>      |                   |
|                                                                                                                        | Symptom                                                                                             | 22.7%              | 20.5%              |                   | 28.0%             | 58.1%             |                   |

|                                                                                                                 |                                                                                       |              |              |              |              |              |              |
|-----------------------------------------------------------------------------------------------------------------|---------------------------------------------------------------------------------------|--------------|--------------|--------------|--------------|--------------|--------------|
|                                                                                                                 | Health behaviour (e.g. smoking)                                                       | 11.3%        | 8.9%         |              | 16.0%        | 51.6%        |              |
|                                                                                                                 | Health impact (e.g. disability)                                                       | 39.3%        | 36.6%        |              | 40.0%        | 25.8%        |              |
|                                                                                                                 | Social deprivation and poverty                                                        | 15.3%        | 10.7%        |              | 16.0%        | 38.7%        |              |
|                                                                                                                 | Consequences of treatment                                                             | 22.7%        | 21.4%        |              | 40.0%        | 29.0%        |              |
|                                                                                                                 | Environmental factors                                                                 | -            | 4.5%         |              | -            | 22.6%        |              |
| How to count conditions (round 1)                                                                               | Count broad disease category based on body and mind system                            | 23.1%        | -            | -            | 12.0%        | -            | -            |
|                                                                                                                 | <b>Count individual conditions</b>                                                    | <b>72.0%</b> |              |              | <b>88.0%</b> |              |              |
|                                                                                                                 | Other                                                                                 | 4.9%         |              |              | 0            |              |              |
| How to count conditions (round 2)                                                                               | <b>Count all of the conditions that are currently active</b>                          | <b>84.0%</b> | -            | -            | <b>80.0%</b> | -            | -            |
|                                                                                                                 | Count the primary health condition                                                    | 4.0%         |              |              | 16.0%        |              |              |
|                                                                                                                 | Only count the complications                                                          | 2.0%         |              |              | 0            |              |              |
| How to count cancers (round 1)                                                                                  | Count all cancers as one                                                              | 25.3%        | -            | -            | 24%          | -            | -            |
|                                                                                                                 | Count individual cancers separately                                                   | <b>62.0%</b> |              |              | <b>76%</b>   |              |              |
|                                                                                                                 | Other                                                                                 | 12.7%        |              |              | 0            |              |              |
| How to count cancers (round 2)                                                                                  | Count all cancers as one                                                              | -            | 14.3%        | -            | -            | 16.1%        | -            |
|                                                                                                                 | Count individual cancers separately irrespective of which systems they affect         |              | 38.4%        |              |              | 38.7%        |              |
|                                                                                                                 | Count individual cancers separately if they affect different systems                  |              | 45.5%        |              |              | 45.2%        |              |
|                                                                                                                 | Other                                                                                 |              | 1.8%         |              |              | 0            |              |
| How to count cancers (round 3)                                                                                  | Count all primary cancers as one                                                      | -            | -            | 11.3%        | -            | -            | 12.0%        |
|                                                                                                                 | Count individual primary cancers separately irrespective of which systems they affect |              |              | 55.7%        |              |              | 48.0%        |
|                                                                                                                 | Count individual primary cancers separately only if they affect different systems     |              |              | 33.0%        |              |              | 36.0%        |
|                                                                                                                 | Other                                                                                 |              |              | 0            |              |              | 4.0%         |
| Conditions included for multimorbidity measurement should be the same/similar in both self-report and databases | <b>Strongly agree</b>                                                                 | -            | <b>32.1%</b> | <b>29.1%</b> | -            | <b>36.7%</b> | <b>44.0%</b> |
|                                                                                                                 | <b>Agree</b>                                                                          |              | <b>41.3%</b> | <b>42.7%</b> |              | <b>60.0%</b> | <b>52.0%</b> |
|                                                                                                                 | Neither agree nor disagree                                                            |              | 11.9%        | 5.5%         |              | 3.3%         | 4.0%         |
|                                                                                                                 | Disagree                                                                              |              | 11.9%        | 7.3%         |              | 0            | 0            |
|                                                                                                                 | Strongly disagree                                                                     |              | 2.8%         | 1.8%         |              | 0            | 0            |

\* multiple select question

**Figure S2: Type of conditions to include when defining multimorbidity**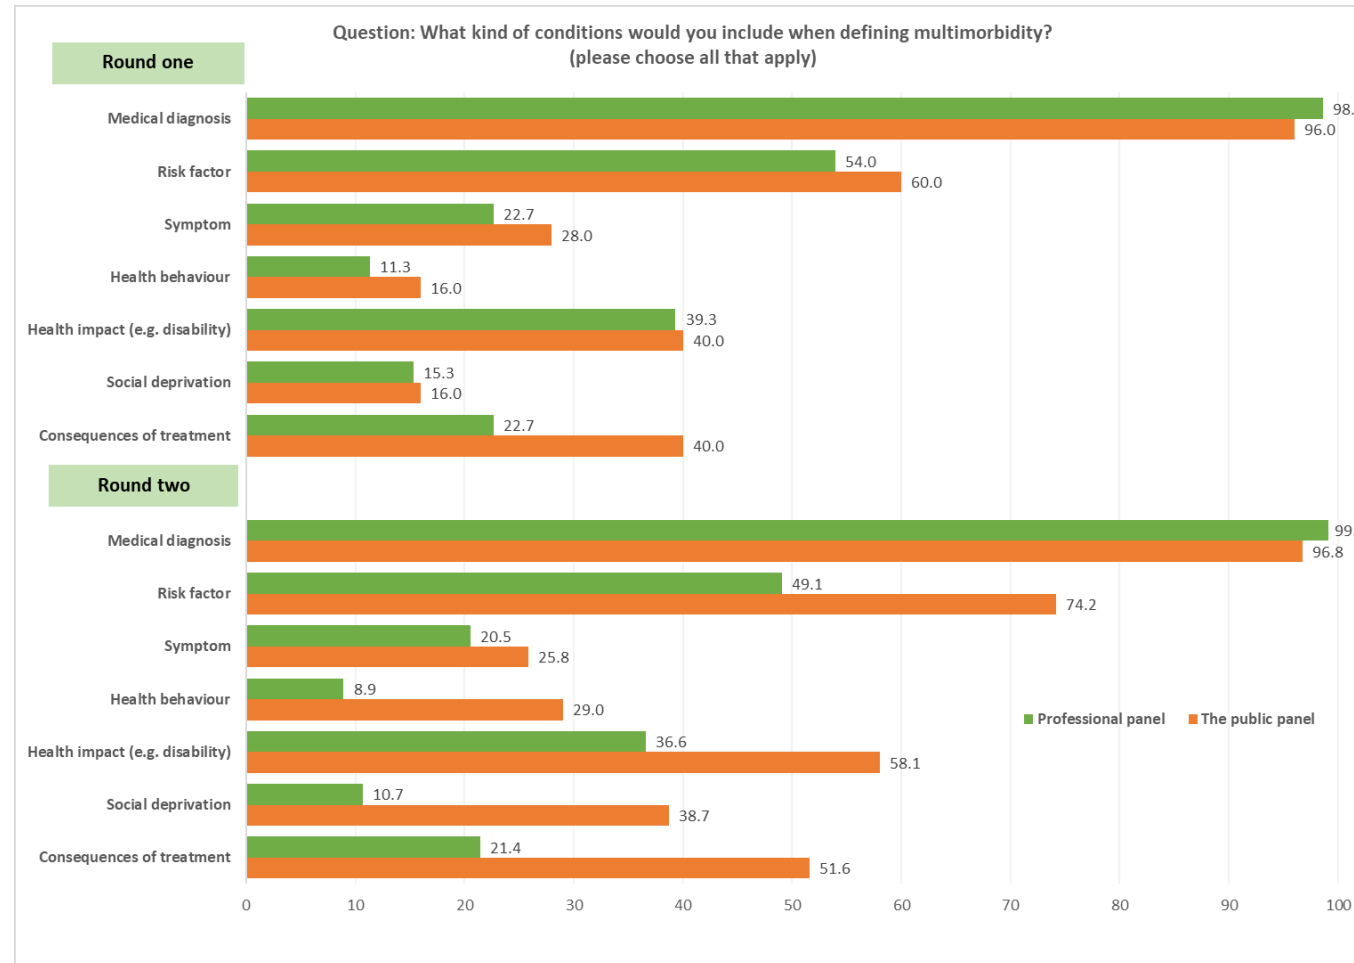



**Table S3: Defining “condition” in the concept of multimorbidity (questions changed from round to round based on participant free-text feedback)**

| Statement                                                                                                                       | Rating                 | Professional panel |                    |                   | Public panel      |                   |                   |
|---------------------------------------------------------------------------------------------------------------------------------|------------------------|--------------------|--------------------|-------------------|-------------------|-------------------|-------------------|
|                                                                                                                                 |                        | Round 1<br>(n=150) | Round 2<br>(n=112) | Round 3<br>(n=97) | Round 1<br>(n=25) | Round 2<br>(n=31) | Round 3<br>(n=25) |
| Include conditions which are permanent in their effects                                                                         | <b>Strongly agree</b>  | <b>89.9%</b>       |                    |                   | <b>80.0%</b>      |                   |                   |
|                                                                                                                                 | <b>Agree</b>           | <b>8.7%</b>        |                    |                   | <b>16.0%</b>      |                   |                   |
|                                                                                                                                 | Neither agree/disagree | 0                  |                    |                   | 0                 |                   |                   |
|                                                                                                                                 | Disagree               | 0                  |                    |                   | 0                 |                   |                   |
|                                                                                                                                 | Strongly disagree      | 1.3%               |                    |                   | 4.0%              |                   |                   |
| Include conditions which are currently active                                                                                   | <b>Strongly agree</b>  | <b>73.2%</b>       |                    |                   | <b>60.0%</b>      | <b>64.5%</b>      |                   |
|                                                                                                                                 | <b>Agree</b>           | <b>25.5%</b>       |                    |                   | <b>28.0%</b>      | <b>29.0%</b>      |                   |
|                                                                                                                                 | Neither agree/disagree | 0                  |                    |                   | 8.0%              | 3.2%              |                   |
|                                                                                                                                 | Disagree               | 0.7%               |                    |                   | 0                 | 0                 |                   |
|                                                                                                                                 | Strongly disagree      | 0.7%               |                    |                   | 4.0%              | 3.2%              |                   |
| Include conditions which may recur but happen rarely                                                                            | Strongly agree         | 13.6%              |                    |                   | 28.0%             |                   |                   |
|                                                                                                                                 | Agree                  | 25.9%              |                    |                   | 16.0%             |                   |                   |
|                                                                                                                                 | Neither agree/disagree | 19.7%              |                    |                   | 36.0%             |                   |                   |
|                                                                                                                                 | Disagree               | 35.4%              |                    |                   | 20.0%             |                   |                   |
|                                                                                                                                 | Strongly disagree      | 5.4%               |                    |                   | 0                 |                   |                   |
| Include conditions which may recur or remit                                                                                     | Strongly agree         |                    | 27.3%              |                   |                   | 41.9%             |                   |
|                                                                                                                                 | Agree                  |                    | 48.2%              |                   |                   | 45.2%             |                   |
|                                                                                                                                 | Neither agree/disagree |                    | 14.5%              |                   |                   | 9.7%              |                   |
|                                                                                                                                 | Disagree               |                    | 7.3%               |                   |                   | 0                 |                   |
|                                                                                                                                 | Strongly disagree      |                    | 2.7%               |                   |                   | 3.2%              |                   |
| Include remitting-relapsing conditions which have relapsed during the last five years                                           | Strongly agree         |                    | 23.4%              | 12.9%             |                   | 43.3%             | 21.0%             |
|                                                                                                                                 | Agree                  |                    | 56.1%              | 48.4%             |                   | 40.0%             | 37.5%             |
|                                                                                                                                 | Neither agree/disagree |                    | 10.3%              | 22.6%             |                   | 10.0%             | 37.5%             |
|                                                                                                                                 | Disagree               |                    | 10.3%              | 15.1%             |                   | 3.3%              | 0                 |
|                                                                                                                                 | Strongly disagree      |                    | 0                  | 1.1%              |                   | 3.3%              | 4.2%              |
| Include remitting-relapsing conditions that require ongoing treatment/ therapy/ care                                            | <b>Strongly agree</b>  |                    |                    | <b>49.0%</b>      |                   |                   | <b>52.0%</b>      |
|                                                                                                                                 | <b>Agree</b>           |                    |                    | <b>44.8%</b>      |                   |                   | <b>40.0%</b>      |
|                                                                                                                                 | Neither agree/disagree |                    |                    | 2.1%              |                   |                   | 0                 |
|                                                                                                                                 | Disagree               |                    |                    | 3.1%              |                   |                   | 0                 |
|                                                                                                                                 | Strongly disagree      |                    |                    | 1.0%              |                   |                   | 8.0%              |
| Only include conditions which usually require formal treatment or care                                                          | Strongly agree         | 13.4%              |                    |                   | 28.0%             |                   |                   |
|                                                                                                                                 | Agree                  | 31.5%              |                    |                   | 20.0%             |                   |                   |
|                                                                                                                                 | Neither agree/disagree | 14.1%              |                    |                   | 8.0%              |                   |                   |
|                                                                                                                                 | Disagree               | 32.9%              |                    |                   | 28.0%             |                   |                   |
|                                                                                                                                 | Strongly disagree      | 8.1%               |                    |                   | 16.0%             |                   |                   |
| Include conditions which usually require 'current' treatment, care or therapy                                                   | <b>Strongly agree</b>  |                    | <b>77.5%</b>       |                   |                   | <b>71.0%</b>      |                   |
|                                                                                                                                 | <b>Agree</b>           |                    | <b>22.5%</b>       |                   |                   | <b>25.8%</b>      |                   |
|                                                                                                                                 | Neither agree/disagree |                    | 0                  |                   |                   | 0                 |                   |
|                                                                                                                                 | Disagree               |                    | 0                  |                   |                   | 0                 |                   |
|                                                                                                                                 | Strongly disagree      |                    | 0                  |                   |                   | 3.2%              |                   |
| Include conditions which usually require treatment, care or therapy 'at some point in the future' even if not currently treated | Strongly agree         |                    | 36.7%              | 13.7%             |                   | 27.6%             | 24.0%             |
|                                                                                                                                 | Agree                  |                    | 38.5%              | 43.2%             |                   | 51.7%             | 44.0%             |
|                                                                                                                                 | Neither agree/disagree |                    | 11.9%              | 23.2%             |                   | 10.3%             | 20.0%             |
|                                                                                                                                 | Disagree               |                    | 12.8%              | 17.9%             |                   | 3.4%              | 8.0%              |
|                                                                                                                                 | Strongly disagree      |                    | 0                  | 2.1%              |                   | 6.9%              | 4.0%              |
| Include conditions which usually require surveillance                                                                           | Strongly agree         |                    | 38.0%              | <b>20.0%</b>      |                   | 41.9%             | <b>32.0%</b>      |
|                                                                                                                                 | Agree                  |                    | 37.0%              | <b>54.7%</b>      |                   | 45.2%             | <b>56.0%</b>      |
|                                                                                                                                 | Neither agree/disagree |                    | 11.1%              | 12.6%             |                   | 9.7%              | 8.0%              |
|                                                                                                                                 | Disagree               |                    | 13.0%              | 11.6%             |                   | 0                 | 0                 |
|                                                                                                                                 | Strongly disagree      |                    | 0.9%               | 1.1%              |                   | 3.2%              | 4.0%              |

Percentages were rounded.

Number of panelists voting “No opinion/Don’t know” was not added in the denominator when calculating percentages

**Table S4: Consideration of conditions to include based on impact (based on participant free-text comments, questions changed from round to round)**

| Statement                                                                              | Rating                     | Professional panel |                   | Public panel     |                  |
|----------------------------------------------------------------------------------------|----------------------------|--------------------|-------------------|------------------|------------------|
|                                                                                        |                            | Round one (n=150)  | Round two (n=112) | Round one (n=25) | Round two (n=31) |
| Include conditions which significantly increase risk of death                          | <b>Strongly agree</b>      | <b>68.7%</b>       | <b>69.4%</b>      | <b>80.0%</b>     |                  |
|                                                                                        | <b>Agree</b>               | <b>20.4%</b>       | <b>25.2%</b>      | <b>20.0%</b>     |                  |
|                                                                                        | Neither agree nor disagree | 5.4%               | 2.7%              | 0                | -                |
|                                                                                        | Disagree                   | 4.8%               | 0.9%              | 0                |                  |
|                                                                                        | Strongly disagree          | 0.7%               | 1.8%              | 0                |                  |
| Include conditions which significantly reduce quality of life                          | <b>Strongly agree</b>      | <b>76.5%</b>       |                   | <b>60.0%</b>     | <b>67.7%</b>     |
|                                                                                        | <b>Agree</b>               | <b>20.1%</b>       |                   | <b>28.0%</b>     | <b>25.8%</b>     |
|                                                                                        | Neither agree nor disagree | 2.7%               | -                 | 8.0%             | 3.2%             |
|                                                                                        | Disagree                   | 0.7%               |                   | 4.0%             | 0                |
|                                                                                        | Strongly disagree          | 0                  |                   | 0                | 3.2%             |
| Include conditions which cause significant physical disability                         | <b>Strongly agree</b>      | <b>69.8%</b>       |                   | <b>68.0%</b>     | <b>64.5%</b>     |
|                                                                                        | <b>Agree</b>               | <b>23.5%</b>       |                   | <b>24.0%</b>     | <b>32.3%</b>     |
|                                                                                        | Neither agree nor disagree | 5.4%               | -                 | 8.0%             | 0                |
|                                                                                        | Disagree                   | 1.3%               |                   | 0                | 0                |
|                                                                                        | Strongly disagree          | 0                  |                   | 0                | 3.2%             |
| Include conditions which cause frailty                                                 | <b>Strongly agree</b>      | <b>65.8%</b>       | <b>61.5%</b>      | <b>44.0%</b>     | <b>51.6%</b>     |
|                                                                                        | <b>Agree</b>               | <b>24.8%</b>       | <b>28.4%</b>      | <b>40.0%</b>     | <b>38.7%</b>     |
|                                                                                        | Neither agree nor disagree | 7.4%               | 5.5%              | 16.0%            | 6.5%             |
|                                                                                        | Disagree                   | 2.0%               | 1.8%              | 0                | 0                |
|                                                                                        | Strongly disagree          | 0                  | 2.8%              | 0                | 3.2%             |
| Include conditions which significantly worsen mental health                            | <b>Strongly agree</b>      | <b>71.8%</b>       |                   | <b>62.5%</b>     | <b>64.5%</b>     |
|                                                                                        | <b>Agree</b>               | <b>20.8%</b>       |                   | <b>16.7%</b>     | <b>22.6%</b>     |
|                                                                                        | Neither agree nor disagree | 6.0%               | -                 | 20.8%            | 9.7%             |
|                                                                                        | Disagree                   | 1.3%               |                   | 0                | 0                |
|                                                                                        | Strongly disagree          | 0                  |                   | 0                | 3.2%             |
| Include conditions which significantly worsen self-perceived health status             | <b>Strongly agree</b>      | <b>49.7%</b>       | <b>48.6%</b>      | 17.4%            | 16.7%            |
|                                                                                        | <b>Agree</b>               | <b>28.9%</b>       | <b>28.8%</b>      | 43.5%            | 46.7%            |
|                                                                                        | Neither agree nor disagree | 17.4%              | 16.2%             | 26.1%            | 30.0%            |
|                                                                                        | Disagree                   | 4.0%               | 4.5%              | 13.0%            | 0                |
|                                                                                        | Strongly disagree          | 0                  | 1.8%              | 0                | 6.7%             |
| Include conditions which significantly increase treatment burden                       | <b>Strongly agree</b>      |                    | <b>55.0%</b>      |                  | <b>51.6%</b>     |
|                                                                                        | <b>Agree</b>               |                    | <b>32.4%</b>      |                  | <b>35.5%</b>     |
|                                                                                        | Neither agree nor disagree | -                  | 7.2%              | -                | 9.7%             |
|                                                                                        | Disagree                   |                    | 3.6%              |                  | 0                |
|                                                                                        | Strongly disagree          |                    | 1.8%              |                  | 3.2%             |
| Include conditions which could be impacted by or impact social deprivation and poverty | Strongly agree             |                    | 25.5%             |                  | <b>38.7%</b>     |
|                                                                                        | Agree                      |                    | 38.7%             |                  | <b>35.5%</b>     |
|                                                                                        | Neither agree nor disagree | -                  | 21.7%             | -                | 16.1%            |
|                                                                                        | Disagree                   |                    | 11.3%             |                  | 3.2%             |
|                                                                                        | Strongly disagree          |                    | 2.8%              |                  | 6.5%             |

Percentages were rounded.

**Table S5: Responses to questions relevant to weighting (based on participant free-text comments, questions changed from round to round)**

| Question                                                                                                 | Responses                                                                                                                                                                                                                                                                                                                                                                                          | Professional round 1<br>No. (%)                                              | Professional round 2<br>No. (%)                    | Professional round 3<br>No. (%) | Public round 1<br>No. (%)                              | Public round 2<br>No. (%)                                          | Public round 3<br>No. (%) |
|----------------------------------------------------------------------------------------------------------|----------------------------------------------------------------------------------------------------------------------------------------------------------------------------------------------------------------------------------------------------------------------------------------------------------------------------------------------------------------------------------------------------|------------------------------------------------------------------------------|----------------------------------------------------|---------------------------------|--------------------------------------------------------|--------------------------------------------------------------------|---------------------------|
| Please describe what type of measures you would use to measure multimorbidity*                           | Weighted morbidity measure<br>A simple count of conditions<br>Other                                                                                                                                                                                                                                                                                                                                | 91 (53.2%)<br>69 (40.4%)<br>11 (6.4%)                                        | -                                                  | -                               | -                                                      | -                                                                  | -                         |
| Please choose what type of measures you would use to understand the impact of multimorbidity on outcomes | Weighted morbidity measure<br>A simple count of conditions<br>Both<br>Other                                                                                                                                                                                                                                                                                                                        | 92 (61.3%)<br>38 (25.3%)<br>7 (4.7%)<br>13 (8.7%)                            | -                                                  | -                               | -                                                      | -                                                                  | -                         |
| What weighting methods would you use in a multimorbidity measure? <sup>a*</sup>                          | Use existing weighted indices<br>Empirically derive weights based on the individual impact of diseases on an outcome (e.g. use regression models to calculate weights)<br>Set rules based on level of severity to grade each condition/disease category (e.g. if having "presence of a condition": 1 point, "treatment": additional 1 point, "functional limitation": additional 1 point)<br>Other | 47 (27.3%)<br>60 (34.9%)<br>47 (27.3%)<br>18 (10.5%)                         | 20 (21.7%)<br>43 (46.7%)<br>24 (26.1%)<br>5 (5.4%) | -                               | -                                                      | -                                                                  | -                         |
| Please rate the degree to which the outcomes listed are important to weight against <sup>a</sup>         |                                                                                                                                                                                                                                                                                                                                                                                                    |                                                                              |                                                    |                                 |                                                        |                                                                    |                           |
| Death                                                                                                    | Not at all important<br>Slightly important<br>Important<br>Sufficiently important<br>Very important                                                                                                                                                                                                                                                                                                | 2 (1.4%)<br>2 (1.4%)<br>6 (4.3%)<br><b>12 (8.6%)</b><br><b>117 (84.2%)</b>   | -                                                  | -                               | 0<br>2 (8.3%)<br>2 (8.3%)<br>4 (16.7%)<br>16 (66.7%)   | 0<br>0<br>1 (3.2%)<br><b>3 (9.7%)</b><br><b>27 (87.1%)</b>         | -                         |
| Healthcare use                                                                                           | Not at all important<br>Slightly important<br>Important<br>Sufficiently important<br>Very important                                                                                                                                                                                                                                                                                                | 1 (0.7%)<br>5 (3.5%)<br>17 (12.1%)<br><b>31 (22.0%)</b><br><b>87 (61.7%)</b> | -                                                  | -                               | 0<br>0<br>7 (29.2%)<br>4 (16.7%)<br>13 (54.2%)         | 0<br>0<br>3 (9.7%)<br><b>11 (35.5%)</b><br><b>17 (54.8%)</b>       | -                         |
| Health-related quality of life                                                                           | Not at all important<br>Slightly important<br>Important<br>Sufficiently important<br>Very important                                                                                                                                                                                                                                                                                                | 1 (0.7%)<br>3 (2.1%)<br>7 (4.9%)<br><b>17 (11.9%)</b><br><b>115 (80.4%)</b>  | -                                                  | -                               | 0<br>3 (12.5%)<br>3 (12.5%)<br>7 (29.2%)<br>11 (45.8%) | 1 (3.2%)<br>0<br>2 (6.5%)<br><b>8 (25.8%)</b><br><b>20 (64.5%)</b> | -                         |

| Question                     | Responses              | Professional round 1<br>No. (%) | Professional round 2<br>No. (%) | Professional round 3<br>No. (%) | Public round 1<br>No. (%) | Public round 2<br>No. (%) | Public round 3<br>No. (%) |
|------------------------------|------------------------|---------------------------------|---------------------------------|---------------------------------|---------------------------|---------------------------|---------------------------|
| Physical disability          | Not at all important   | 1 (0.7%)                        | -                               | -                               | 0                         | 0                         | -                         |
|                              | Slightly important     | 3 (2.2%)                        | -                               | -                               | 1 (4.2%)                  | 1 (3.3%)                  | -                         |
|                              | Important              | 13 (9.4%)                       | -                               | -                               | 10 (41.7%)                | 3 (10.0%)                 | -                         |
|                              | Sufficiently important | <b>30 (21.6%)</b>               | -                               | -                               | 6 (25.0%)                 | <b>12 (40.0%)</b>         | -                         |
|                              | Very important         | <b>92 (66.2%)</b>               | -                               | -                               | 7 (29.2%)                 | <b>14 (46.7%)</b>         | -                         |
| Frailty                      | Not at all important   | 2 (1.4%)                        | -                               | -                               | 0                         | 0                         | -                         |
|                              | Slightly important     | 3 (2.2%)                        | -                               | -                               | 5 (20.0%)                 | 1 (3.3%)                  | -                         |
|                              | Important              | 14 (10.1%)                      | -                               | -                               | 10 (40.0%)                | 6 (20.0%)                 | -                         |
|                              | Sufficiently important | <b>42 (30.2%)</b>               | -                               | -                               | 4 (16.0%)                 | <b>11 (36.7%)</b>         | -                         |
|                              | Very important         | <b>78 (56.1%)</b>               | -                               | -                               | 6 (24.0%)                 | <b>12 (40.0%)</b>         | -                         |
| Mental health                | Not at all important   | 2 (1.4%)                        | -                               | -                               | 0                         | <sup>b</sup>              | -                         |
|                              | Slightly important     | 6 (4.3%)                        | -                               | -                               | 1 (4.0%)                  |                           | -                         |
|                              | Important              | 14 (10.1%)                      | -                               | -                               | 8 (32.0%)                 |                           | -                         |
|                              | Sufficiently important | <b>36 (26.1%)</b>               | -                               | -                               | 5 (20.0%)                 |                           | -                         |
|                              | Very important         | <b>80 (58.0%)</b>               | -                               | -                               | 11 (44.0%)                |                           | -                         |
| Treatment burden             | Not at all important   | 3 (2.2%)                        | -                               | -                               | 1 (4.2%)                  | 1 (3.3%)                  | -                         |
|                              | Slightly important     | 9 (6.5%)                        | -                               | -                               | 10 (40.0%)                | 6 (20%)                   | -                         |
|                              | Important              | 24 (17.3%)                      | -                               | -                               | 2 (8.0%)                  | 3 (10%)                   | -                         |
|                              | Sufficiently important | <b>32 (23.0%)</b>               | -                               | -                               | 7 (28.0%)                 | 12 (40.0%)                | -                         |
|                              | Very important         | <b>71 (51.1%)</b>               | -                               | -                               | 5 (20.0%)                 | 8 (26.7%)                 | -                         |
| Healthcare costs             | Not at all important   | 5 (3.6%)                        | -                               | -                               | 3 (12.5%)                 | 2 (6.7%)                  | -                         |
|                              | Slightly important     | 8 (5.8%)                        | -                               | -                               | 6 (24.0%)                 | 10 (33.3%)                | -                         |
|                              | Important              | 26 (18.7%)                      | -                               | -                               | 4 (16.0%)                 | 8 (26.7%)                 | -                         |
|                              | Sufficiently important | <b>46 (33.1%)</b>               | -                               | -                               | 6 (24.0%)                 | 5 (16.7%)                 | -                         |
|                              | Very important         | <b>54 (38.8%)</b>               | -                               | -                               | 6 (24.0%)                 | 5 (16.7%)                 | -                         |
| Self-perceived health status | Not at all important   | 3 (2.1%)                        | -                               | -                               | 2 (8.0%)                  | 2 (6.5%)                  | -                         |
|                              | Slightly important     | 11 (7.9%)                       | -                               | -                               | 5 (20.0%)                 | 6 (19.4%)                 | -                         |
|                              | Important              | 22 (15.7%)                      | -                               | -                               | 6 (24.0%)                 | 7 (22.6%)                 | -                         |
|                              | Sufficiently important | <b>40 (28.6%)</b>               | -                               | -                               | 6 (24.0%)                 | 9 (29.0%)                 | -                         |
|                              | Very important         | <b>64 (45.7%)</b>               | -                               | -                               | 6 (24.0%)                 | 7 (22.6%)                 | -                         |

Number of panelists voting "no opinion" was not added in the denominator when calculating percentages. \*multiple select question; a: Non-mandatory question; b: we did not ask this question in round two because some panelists commented that conditions cannot be weighted against based on the general term "mental health"

**Table S6: Professional ratings for choice of simple counts vs weighted measures depending on the purpose of a study**

| Question                                                                                                                                                  | Response                                                               | Round 2<br>No. of<br>panelists (%)     | Round 3<br>No. of<br>panelists (%)     | Round 3 summary                                                                                                                                   |
|-----------------------------------------------------------------------------------------------------------------------------------------------------------|------------------------------------------------------------------------|----------------------------------------|----------------------------------------|---------------------------------------------------------------------------------------------------------------------------------------------------|
| For the purpose of estimating the prevalence of multimorbidity                                                                                            | Prefer simple count<br>Prefer weighted measure<br>Either is acceptable | 66 (59.5%)<br>18 (16.2%)<br>27 (24.3%) | 58 (63.0%)<br>15 (16.3%)<br>19 (20.7%) | <b>77 (83.7%) prefer a simple count or think it equally acceptable</b><br>34 (37.0%) prefer a weighted measure or think it equally acceptable     |
| For the purpose of identifying and counting disease clusters                                                                                              | Prefer simple count<br>Prefer weighted measure<br>Either is acceptable | 66 (68.8%)<br>15 (15.6%)<br>15 (15.6%) | 59 (64.8%)<br>18 (19.8%)<br>14 (15.4%) | <b>73 (80.2%) prefer a simple count or think it equally acceptable</b><br>32 (35.2%) prefer a weighted measure or think it equally acceptable     |
| For the purpose of exploring trajectories of multimorbidity (e.g. trends of multimorbidity prevalence and the number of conditions an individual has had) | Prefer simple count<br>Prefer weighted measure<br>Either is acceptable | 35 (32.4%)<br>27 (25.0%)<br>46 (42.6%) | 34 (38.6%)<br>24 (27.3%)<br>30 (34.1%) | <b>64 (72.7%) prefer a simple count or think it equally acceptable</b><br>54 (61.4%) prefer a weighted measure or think it equally acceptable     |
| For the purpose of exploring/identifying predictors of multimorbidity (e.g. socio-demographic information)                                                | Prefer simple count<br>Prefer weighted measure<br>Either is acceptable | 30 (27.5%)<br>35 (32.1%)<br>44 (40.4%) | 28 (30.8%)<br>32 (35.2%)<br>31 (34.1%) | 59 (64.9%) prefer a simple count or think it equally acceptable<br>63 (69.3%) prefer a weighted measure or think it equally acceptable            |
| For the purpose of assessing the severity of disease burden                                                                                               | Prefer simple count<br>Prefer weighted measure<br>Either is acceptable | 12 (10.8%)<br>56 (50.5%)<br>43 (38.7%) | 5 (5.4%)<br>66 (71.7%)<br>21 (22.8%)   | 26 (28.2%) prefer a simple count or think it equally acceptable<br><b>87 (94.5%) prefer a weighted measure or think it equally acceptable</b>     |
| For the purpose of risk adjustment or outcome prediction                                                                                                  | Prefer simple count<br>Prefer weighted measure<br>Either is acceptable | 8 (7.3%)<br>57(52.3%)<br>44 (40.4%)    | 8 (8.8%)<br>62 (68.1%)<br>21 (23.1%)   | 29 (31.9%) prefer a weighted measure or think it equally acceptable<br><b>83 (91.2%) prefer a weighted measure or think it equally acceptable</b> |

**Table S7: Professional ratings for choice of simple counts vs weighted measures for outcome prediction depending on the outcome being measured**

| For the following outcomes of interest, please choose which type of multimorbidity measures you would prefer to use for outcome prediction <sup>a</sup> |                                                                        | Round 2<br>No. of<br>panelists<br>(%)  | Round 3<br>No. of<br>panelists (%)     | Round 3 summary                                                                                                                               |
|---------------------------------------------------------------------------------------------------------------------------------------------------------|------------------------------------------------------------------------|----------------------------------------|----------------------------------------|-----------------------------------------------------------------------------------------------------------------------------------------------|
| Death                                                                                                                                                   | Prefer simple count<br>Prefer weighted measure<br>Either is acceptable | 25 (24.5%)<br>41 (40.2%)<br>36 (35.3%) | 10 (10.6%)<br>54 (57.4%)<br>30 (31.9%) | 40 (42.5%) prefer a simple count or think it equally acceptable<br><b>94 (89.3%) prefer a weighted measure or think it equally acceptable</b> |
| Healthcare use                                                                                                                                          | Prefer simple count<br>Prefer weighted measure<br>Either is acceptable | 28 (26.2%)<br>39 (36.4%)<br>40 (37.4%) | 15 (16.1%)<br>41 (44.1%)<br>37 (39.8%) | 52 (55.1%) prefer a simple count or think it equally acceptable<br><b>78 (83.9%) prefer a weighted measure or think it equally acceptable</b> |
| Health-related quality of life                                                                                                                          | Prefer simple count<br>Prefer weighted measure<br>Either is acceptable | 15 (14.2%)<br>49 (46.2%)<br>42 (39.6%) | 5 (5.3%)<br>54 (57.4%)<br>35 (37.2%)   | 40 (42.5%) prefer a simple count or think it equally acceptable<br><b>89 (94.6%) prefer a weighted measure or think it equally acceptable</b> |
| Physical disability                                                                                                                                     | Prefer simple count<br>Prefer weighted measure<br>Either is acceptable | 18 (16.8%)<br>49 (45.8%)<br>40 (37.4%) | 8 (8.5%)<br>54 (57.4%)<br>32 (34.0%)   | 40 (42.5%) prefer a simple count or think it equally acceptable<br><b>86 (91.4%) prefer a weighted measure or think it equally acceptable</b> |
| Frailty                                                                                                                                                 | Prefer simple count<br>Prefer weighted measure<br>Either is acceptable | 17 (15.9%)<br>47 (43.9%)<br>43 (23.4%) | 9 (9.6%)<br>52 (55.3%)<br>33 (35.1%)   | 42 (44.7%) prefer a simple count or think it equally acceptable<br><b>85 (90.4%) prefer a weighted measure or think it equally acceptable</b> |
| Mental health                                                                                                                                           | Prefer simple count<br>Prefer weighted measure<br>Either is acceptable | 25 (40.2%)<br>43 (56.2%)<br>39 (36.4%) | 14 (15.2%)<br>42 (45.7%)<br>36 (39.1%) | 50 (54.3%) prefer a simple count or think it equally acceptable<br><b>78 (84.8%) prefer a weighted measure or think it equally acceptable</b> |
| Treatment burden                                                                                                                                        | Prefer simple count<br>Prefer weighted measure<br>Either is acceptable | 19 (17.8%)<br>47 (43.9%)<br>41 (38.3%) | 12 (12.8%)<br>53 (56.4%)<br>29 (30.9%) | 41 (43.7%) prefer a simple count or think it equally acceptable<br><b>82 (87.3%) prefer a weighted measure or think it equally acceptable</b> |
| Healthcare costs                                                                                                                                        | Prefer simple count<br>Prefer weighted measure<br>Either is acceptable | 20 (18.9%)<br>40 (37.7%)<br>46 (43.4%) | 14 (15.2%)<br>41 (44.6%)<br>37 (40.2%) | 51 (55.4%) prefer a simple count or think it equally acceptable<br><b>78 (84.8%) prefer a weighted measure or think it equally acceptable</b> |
| Self-perceived health status                                                                                                                            | Prefer simple count<br>Prefer weighted measure<br>Either is acceptable | 24 (23.1%)<br>41 (39.4%)<br>39 (37.5%) | 15 (16.1%)<br>40 (43.0%)<br>38 (40.9%) | 53 (57.0%) prefer a simple count or think it equally acceptable<br><b>78 (83.9%) prefer a weighted measure or think it equally acceptable</b> |

**Table S8: Professional scores for 'always include'**

| Condition                                                                 | Round 1<br>N=150<br>% | Round 2<br>N=112<br>% | Round 3<br>N=97<br>% | Professional panel<br>consensus |
|---------------------------------------------------------------------------|-----------------------|-----------------------|----------------------|---------------------------------|
| Heart failure <sup>a</sup>                                                | 90.0                  | -                     | -                    | Always include                  |
| Chronic liver disease <sup>a</sup>                                        | 88.5                  | -                     | -                    | Always include                  |
| Diabetes <sup>a</sup>                                                     | 87.3                  | -                     | -                    | Always include                  |
| Parkinson's disease <sup>a</sup>                                          | 86.6                  | -                     | -                    | Always include                  |
| End-stage kidney disease <sup>a</sup>                                     | 86.4                  | -                     | -                    | Always include                  |
| Chronic obstructive pulmonary disease <sup>a</sup>                        | 85.9                  | -                     | -                    | Always include                  |
| Coronary artery disease <sup>a</sup>                                      | 82.7                  | -                     | -                    | Always include                  |
| Dementia <sup>a</sup>                                                     | 82.6                  | -                     | -                    | Always include                  |
| Inflammatory bowel disease <sup>a</sup>                                   | 82.6                  | -                     | -                    | Always include                  |
| Multiple sclerosis <sup>a</sup>                                           | 80.7                  | -                     | -                    | Always include                  |
| Stroke <sup>a</sup>                                                       | 80.0                  | -                     | -                    | Always include                  |
| Connective tissue disease <sup>a</sup>                                    | 79.7                  | -                     | -                    | Always include                  |
| Chronic kidney disease <sup>a</sup>                                       | 79.3                  | -                     | -                    | Always include                  |
| HIV/AIDS <sup>a</sup>                                                     | 78.5                  | -                     | -                    | Always include                  |
| Metastatic cancers <sup>a</sup>                                           | 77.4                  | -                     | -                    | Always include                  |
| Haematological cancers <sup>a</sup>                                       | 77.2                  | -                     | -                    | Always include                  |
| Solid organ cancers <sup>a</sup>                                          | 76.5                  | -                     | -                    | Always include                  |
| Paralysis <sup>a</sup>                                                    | 76.0                  | -                     | -                    | Always include                  |
| Cystic fibrosis <sup>a</sup>                                              | 75.8                  | -                     | -                    | Always include                  |
| Schizophrenia <sup>a</sup>                                                | 75.2                  | -                     | -                    | Always include                  |
| Epilepsy <sup>a</sup>                                                     | 73.0                  | -                     | -                    | Always include                  |
| Peripheral artery disease <sup>a</sup>                                    | 71.1                  | -                     | -                    | Always include                  |
| Asthma <sup>a</sup>                                                       | 70.7                  | -                     | -                    | Always include                  |
| Depression                                                                | 69.6                  | 67.0                  | -                    |                                 |
| Heart valve disorders                                                     | 57.7                  | 53.6                  | -                    |                                 |
| Bipolar disorder                                                          | 61.9                  | 61.8                  | -                    |                                 |
| Melanoma                                                                  | 65.8                  | 54.5                  | -                    |                                 |
| Addison's disease <sup>b</sup>                                            | -                     | 48.1                  | 34.5                 |                                 |
| Bronchiectasis <sup>b</sup>                                               | -                     | 36.9                  | 31.1                 |                                 |
| Osteoarthritis                                                            | 59.7                  | 51.4                  | -                    |                                 |
| Pancreatic disease                                                        | 66.0                  | 38.5                  | -                    |                                 |
| Arrhythmia                                                                | 58.4                  | 46.4                  | -                    |                                 |
| Thyroid problems                                                          | 59.7                  | 40.0                  | -                    |                                 |
| Venous thrombotic disease                                                 | 45.9                  | 43.5                  | -                    |                                 |
| Drug/alcohol misuse                                                       | 51.4                  | 51.8                  | -                    |                                 |
| Anaemia                                                                   | 43.9                  | 44.0                  | -                    |                                 |
| Chronic Lyme disease <sup>b</sup>                                         | -                     | 29.8                  | 25.3                 |                                 |
| Transient ischaemic attack                                                | 49.3                  | 48.2                  | -                    |                                 |
| Hypertension                                                              | 56.7                  | 43.8                  | -                    |                                 |
| Anxiety                                                                   | 52.0                  | 47.3                  | -                    |                                 |
| Treated cancer that requires surveillance <sup>c</sup>                    | -                     | -                     | 35.9                 |                                 |
| Eating disorders                                                          | 45.0                  | 44.5                  | -                    |                                 |
| Vision impairment or blindness that cannot be corrected with glasses      | 52.7                  | 46.4                  | -                    |                                 |
| Musculoskeletal problems due to injury                                    | 44.5                  | 41.1                  | 36.1                 |                                 |
| Tuberculosis                                                              | 61.5                  | 46.8                  | -                    |                                 |
| Gout                                                                      | 45.3                  | 38.5                  | -                    |                                 |
| Endometriosis                                                             | 42.4                  | 35.5                  | -                    |                                 |
| Chronic primary pain <sup>d</sup>                                         | 48.3                  | -                     | 33.0                 |                                 |
| Peptic ulcer                                                              | 48.6                  | 36.9                  | -                    |                                 |
| Hearing impairment or deafness that cannot be corrected with hearing aids | 48.0                  | 39.6                  | -                    |                                 |
| Post-acute COVID-19 <sup>b</sup>                                          | -                     | 27.7                  | 24.5                 |                                 |
| Post-traumatic stress disorder                                            | 38.0                  | 42.2                  | -                    |                                 |

|                                                        |      |      |      |
|--------------------------------------------------------|------|------|------|
| Psoriasis                                              | 43.2 | 31.2 | -    |
| Benign cerebral tumours <sup>c</sup>                   | -    | -    | 28.9 |
| Peripheral neuropathy                                  | 52.4 | 36.1 | -    |
| Hypertension (untreated)                               | 54.7 | 39.6 | -    |
| Sleep apnoea                                           | 45.5 | 29.9 | -    |
| Congenital disease and chromosomal abnormalities       | 46.2 | 35.8 | -    |
| Chronic low back pain <sup>d</sup>                     | -    | -    | 30.9 |
| Chronic urinary tract infection                        | 38.6 | 30.0 | -    |
| Aneurysm <sup>c</sup>                                  | -    | -    | 22.7 |
| Meniere's disease                                      | 34.9 | 26.9 | -    |
| Migraine or other regular headache                     | 37.8 | 28.7 | -    |
| Osteoporosis                                           | 52.0 | 41.4 | -    |
| Autism                                                 | 36.2 | 29.0 | -    |
| Obsessive compulsive disorder                          | 38.6 | 32.7 | -    |
| Dissociative or personality disorders                  | 41.0 | 40.7 | -    |
| Glaucoma                                               | 44.2 | 36.0 | -    |
| Urinary incontinence                                   | 38.8 | 31.5 | -    |
| Irritable bowel syndrome                               | 38.8 | 29.4 | -    |
| Polycystic ovary syndrome                              | 36.6 | 29.8 | -    |
| Chronic insomnia                                       | 35.0 | 30.8 | -    |
| Obesity                                                | 48.3 | 35.1 | -    |
| Dyslipidaemia (treated)                                | 39.6 | 33.6 | -    |
| Uterine (womb) problems                                | 31.0 | 21.6 | -    |
| Cataract                                               | 31.8 | 26.1 | -    |
| Gall bladder problems                                  | 35.9 | 26.4 | -    |
| Prostatic hypertrophy                                  | 29.5 | 27.2 | -    |
| Attention deficit hyperactivity disorder               | 27.0 | 25.9 | -    |
| Somatoform disorders                                   | 30.7 | 25.5 | -    |
| Gastroesophageal reflux                                | 32.0 | 27.3 | -    |
| Chronic urticaria                                      | 29.1 | 19.2 | -    |
| Malnutrition                                           | 36.2 | 28.3 | -    |
| High cholesterol (untreated)                           | 44.9 | 25.5 | -    |
| Learning disability                                    | 28.1 | 25.2 | -    |
| Kidney or bladder stones                               | 28.6 | 22.4 | -    |
| Physical disability                                    | 38.9 | 27.9 | -    |
| Eczema                                                 | 25.9 | 19.3 | -    |
| Non-melanoma skin cancer                               | 30.3 | 23.1 | -    |
| Chronic sinusitis                                      | 27.4 | 17.3 | -    |
| Chronic/allergic rhinitis                              | 30.1 | 17.4 | -    |
| Diverticulosis                                         | 38.7 | 22.2 | -    |
| Chronic gum disease                                    | 16.8 | 19.8 | -    |
| Nicotine dependence                                    | 20.0 | 22.2 | -    |
| Sexual dysfunction                                     | 14.0 | 16.2 | -    |
| Edentulism                                             | 20.1 | 18.7 | -    |
| Smoking                                                | 29.3 | 27.9 | -    |
| Social deprivation and poverty                         | 24.3 | 17.9 | -    |
| Infertility                                            | 10.6 | 14.0 | -    |
| Post-sepsis syndrome                                   | 14.3 | 15.7 | -    |
| Treatment burden                                       | 16.1 | 14.5 | -    |
| Dizziness                                              | 10.3 | 10.8 | -    |
| Side effects of medications                            | 12.0 | 11.9 | -    |
| Chronic cough                                          | 8.3  | 10.7 | -    |
| Benign cancers                                         | 18.6 | 9.3  | -    |
| Sedentary lifestyle                                    | 14.4 | 9.9  | -    |
| Treated cancer not requiring surveillance <sup>c</sup> | -    | -    | 5.4  |

a. Reached 'always include' consensus after round 1

b. Proposed as additional conditions by participants after round 1

c. Proposed as additional conditions by participants after round 2

d. Chronic pain asked about in rounds 1, split into chronic primary pain and chronic low back pain by participants after round 2



**Table S9: Public scores for 'always include'**

| Condition                                 | Round 1<br>N=150<br>% | Round 2<br>N=112<br>% | Round 3<br>N=97<br>% | Public panel<br>consensus |
|-------------------------------------------|-----------------------|-----------------------|----------------------|---------------------------|
| End-stage kidney disease                  | 68.0                  | 90.3                  | -                    | Always include            |
| Heart failure                             | 68.0                  | 83.9                  | -                    | Always include            |
| Dementia                                  | 60.0                  | 83.3                  | -                    | Always include            |
| Chronic liver disease                     | 64.0                  | 80.6                  | -                    | Always include            |
| Stroke                                    | 60.0                  | 80.6                  | -                    | Always include            |
| Chronic kidney disease                    | 64.0                  | 80.6                  | -                    | Always include            |
| Parkinson's disease                       | 56.0                  | 77.4                  | -                    | Always include            |
| Multiple sclerosis                        | 60.0                  | 77.4                  | -                    | Always include            |
| Coronary artery disease                   | 64.0                  | 74.2                  | -                    | Always include            |
| Cystic fibrosis                           | 62.5                  | 74.2                  | -                    | Always include            |
| Diabetes                                  | 64.0                  | 71.0                  | -                    | Always include            |
| HIV/AIDS                                  | 37.5                  | 71.0                  | -                    | Always include            |
| Epilepsy                                  | 44.0                  | 71.0                  | -                    | Always include            |
| Addison's disease                         | -                     | 40.0                  | 70.8                 | Always include            |
| Metastatic cancers                        | 70.8                  | 80.0                  | -                    | Always include            |
| Haematological cancers                    | 70.8                  | 77.4                  | -                    | Always include            |
| Solid organ cancers                       | 70.8                  | 80.0                  | -                    | Always include            |
| Inflammatory bowel disease                | 60.0                  | 58.1                  | -                    |                           |
| Heart valve disorders                     | 36.0                  | 61.3                  | -                    |                           |
| Melanoma                                  | 58.3                  | 67.7                  | -                    |                           |
| Chronic obstructive pulmonary disease     | 60.0                  | 67.7                  | -                    |                           |
| Peripheral artery disease                 | 24.0                  | 35.5                  | -                    |                           |
| Venous thrombotic disease                 | 48.0                  | 64.5                  | -                    |                           |
| Transient ischaemic attack                | 32.0                  | 64.5                  | -                    |                           |
| Aneurysm                                  | -                     | 67.7                  | -                    |                           |
| Pancreatic disease                        | 48.0                  | 53.3                  | -                    |                           |
| Anaemia                                   | 24.0                  | 43.3                  | -                    |                           |
| Peripheral neuropathy                     | 44.0                  | 26.7                  | -                    |                           |
| Schizophrenia                             | 56.5                  | 67.7                  | -                    |                           |
| Bipolar disorder                          | 52.2                  | 51.6                  | -                    |                           |
| Connective tissue disease                 | 54.2                  | 66.7                  | -                    |                           |
| Paralysis                                 | 56.0                  | 63.3                  | -                    |                           |
| Post-acute COVID-19                       | -                     | 44.8                  | 60.0                 |                           |
| Tuberculosis                              | 54.2                  | 54.8                  | -                    |                           |
| Congenital disease                        | 44.0                  | 53.3                  | -                    |                           |
| Prostatic hypertrophy                     | 25.0                  | 23.3                  | -                    |                           |
| Endometriosis                             | 36.4                  | 50.0                  | -                    |                           |
| Bronchiectasis                            | -                     | 45.2                  | 48.0                 |                           |
| Osteoarthritis                            | 41.7                  | 41.9                  | -                    |                           |
| Thyroid problems                          | 37.5                  | 35.5                  | -                    |                           |
| Autism                                    | 22.7                  | 35.5                  | -                    |                           |
| Chronic urinary tract infection           | 20.0                  | 40.0                  | -                    |                           |
| Polycystic ovary syndrome                 | 40.9                  | 37.9                  | -                    |                           |
| Arrhythmia                                | 28.0                  | 39.3                  | -                    |                           |
| Peptic ulcer                              | 29.2                  | 35.5                  | -                    |                           |
| Learning disability                       | 25.0                  | 38.7                  | -                    |                           |
| Asthma                                    | 32.0                  | 58.1                  | -                    |                           |
| Osteoporosis                              | 33.3                  | 45.2                  | -                    |                           |
| Uterine (womb) problems                   | 22.7                  | 35.5                  | -                    |                           |
| Treated cancer that requires surveillance | -                     | -                     | 36.0                 |                           |
| Chronic primary pain                      | 24.0                  | -                     | 20.0                 |                           |
| Malnutrition                              | 14.3                  | 36.7                  | -                    |                           |
| Non-melanoma skin cancer                  | 30.4                  | 36.7                  | -                    |                           |
| Chronic Lyme disease                      | -                     | 38.7                  | 45.8                 |                           |

|                                                                           |      |      |      |  |
|---------------------------------------------------------------------------|------|------|------|--|
| Depression                                                                | 37.5 | 25.8 | -    |  |
| Irritable bowel syndrome                                                  | 20.0 | 26.7 | -    |  |
| Kidney or bladder stones                                                  | 20.0 | 26.7 | -    |  |
| Benign cerebral tumours                                                   | -    |      | 52.0 |  |
| Diverticulosis                                                            | 25.0 | 24.1 | -    |  |
| Drug/alcohol misuse                                                       | 20.8 | 35.5 | -    |  |
| Eating disorders                                                          | 34.8 | 45.2 | -    |  |
| Vision impairment or blindness that cannot be corrected with glasses      | 36.0 | 41.9 | -    |  |
| Hearing impairment or deafness that cannot be corrected with hearing aids | 25.0 | 38.7 | -    |  |
| Post-traumatic stress disorder                                            | 30.4 | 25.8 | -    |  |
| Dyslipidaemia (treated)                                                   | 24.0 | 29.0 | -    |  |
| Physical disability                                                       | 29.2 | 41.9 | -    |  |
| Hypertension (untreated)                                                  | 29.2 | 35.5 | -    |  |
| Meniere's disease                                                         | 29.2 | 25.8 | -    |  |
| Dissociative or personality disorders                                     | 42.9 | 41.9 | -    |  |
| Musculoskeletal problems due to injury                                    | 25.0 | 16.1 | 45.8 |  |
| Glaucoma                                                                  | 39.1 | 33.3 | -    |  |
| Gall bladder problems                                                     | 29.2 | 36.7 | -    |  |
| Sleep apnoea                                                              | 37.5 | 19.4 | -    |  |
| Obsessive compulsive disorder                                             | 14.3 | 22.6 | -    |  |
| Urinary incontinence                                                      | 20.8 | 22.6 | -    |  |
| Chronic/allergic rhinitis                                                 | 16.7 | 16.1 | -    |  |
| Gout                                                                      | 25.0 | 19.4 | -    |  |
| Psoriasis                                                                 | 16.7 | 16.1 | -    |  |
| Obesity                                                                   | 20.8 | 16.1 | -    |  |
| Attention deficit hyperactivity disorder                                  | 19.0 | 12.9 | -    |  |
| Somatoform disorders                                                      | 5.0  | 17.2 | -    |  |
| Hypertension (treated)                                                    | 29.2 | 16.7 | -    |  |
| Anxiety                                                                   | 25.0 | 16.7 | -    |  |
| Benign cancers                                                            | 17.4 | 17.2 | -    |  |
| Migraine or other regular headache                                        | 20.8 | 12.9 | -    |  |
| Gastroesophageal reflux                                                   | 24.0 | 12.9 | -    |  |
| Eczema                                                                    | 20.8 | 6.5  | -    |  |
| Post-sepsis syndrome                                                      | 23.8 | 28.6 | -    |  |
| Chronic low back pain                                                     | -    | -    | 24.0 |  |
| Cataract                                                                  | 20.8 | 16.1 | -    |  |
| Treatment burden                                                          | 12.5 | 20.0 | -    |  |
| Side effects of medications                                               | 16.7 | 23.3 | -    |  |
| Social deprivation and poverty                                            | 17.4 | 23.3 | -    |  |
| Chronic sinusitis                                                         | 16.0 | 9.7  | -    |  |
| Nicotine dependence                                                       | 13.6 | 22.6 | -    |  |
| High cholesterol (untreated)                                              | 29.2 | 12.9 | -    |  |
| Smoking                                                                   | 17.4 | 16.1 | -    |  |
| Chronic insomnia                                                          | 18.2 | 13.3 | -    |  |
| Chronic urticaria                                                         | 13.0 | 6.9  | -    |  |
| Chronic gum disease                                                       | 21.7 | 9.7  | -    |  |
| Chronic cough                                                             | 12.5 | 3.2  | -    |  |
| Sedentary lifestyle                                                       | 0.0  | 9.7  | -    |  |
| Sexual dysfunction                                                        | 13.6 | 13.8 | -    |  |
| Edentulism                                                                | 8.3  | 6.5  | -    |  |
| Dizziness                                                                 | 17.4 | 3.2  | -    |  |
| Infertility                                                               | 22.7 | 17.2 | -    |  |
| Treated cancer not requiring surveillance                                 | -    | -    | 8.0  |  |

**Table S10: Professional scores for 'usually include' (the sum of 'always' and 'usually')**

| Condition                                                                 | Round 1<br>N=150<br>% | Round 2<br>N=112<br>% | Round 3<br>N=97<br>% | Professional panel consensus |
|---------------------------------------------------------------------------|-----------------------|-----------------------|----------------------|------------------------------|
| Heart failure                                                             | 98.7                  | -                     | -                    | Always include               |
| Chronic liver disease                                                     | 98.6                  | -                     | -                    | Always include               |
| Diabetes                                                                  | 98.7                  | -                     | -                    | Always include               |
| Parkinson's disease                                                       | 98.0                  | -                     | -                    | Always include               |
| End-stage kidney disease                                                  | 94.6                  | -                     | -                    | Always include               |
| Chronic obstructive pulmonary disease                                     | 98.7                  | -                     | -                    | Always include               |
| Coronary artery disease                                                   | 97.3                  | -                     | -                    | Always include               |
| Dementia                                                                  | 96.6                  | -                     | -                    | Always include               |
| Inflammatory bowel disease                                                | 94.0                  | -                     | -                    | Always include               |
| Multiple sclerosis                                                        | 94.0                  | -                     | -                    | Always include               |
| Stroke                                                                    | 97.3                  | -                     | -                    | Always include               |
| Connective tissue disease                                                 | 97.3                  | -                     | -                    | Always include               |
| Chronic kidney disease                                                    | 97.3                  | -                     | -                    | Always include               |
| HIV/AIDS                                                                  | 94.0                  | -                     | -                    | Always include               |
| Metastatic cancers                                                        | 91.1                  | -                     | -                    | Always include               |
| Haematological cancers                                                    | 94.0                  | -                     | -                    | Always include               |
| Solid organ cancers                                                       | 94.6                  | -                     | -                    | Always include               |
| Paralysis                                                                 | 88.4                  | -                     | -                    | Always include               |
| Cystic fibrosis                                                           | 90.6                  | -                     | -                    | Always include               |
| Schizophrenia                                                             | 94.0                  | -                     | -                    | Always include               |
| Epilepsy                                                                  | 95.3                  | -                     | -                    | Always include               |
| Peripheral artery disease                                                 | 92.6                  | -                     | -                    | Always include               |
| Asthma                                                                    | 92.7                  | -                     | -                    | Always include               |
| Depression                                                                | 93.9                  | 92.9                  | -                    | Usually include              |
| Heart valve disorder                                                      | 85.2                  | 92.0                  | -                    | Usually include              |
| Bipolar disorder                                                          | 90.5                  | 90.0                  | -                    | Usually include              |
| Melanoma                                                                  | 87.7                  | 88.2                  | -                    | Usually include              |
| Addison's disease                                                         | -                     | 83.7                  | 86.9                 | Usually include              |
| Bronchiectasis                                                            | -                     | 78.6                  | 86.7                 | Usually include              |
| Osteoarthritis                                                            | 87.9                  | 84.7                  | -                    | Usually include              |
| Pancreatic disease                                                        | 88.9                  | 84.4                  | -                    | Usually include              |
| Arrhythmia                                                                | 85.9                  | 83.9                  | -                    | Usually include              |
| Thyroid problems                                                          | 83.9                  | 82.7                  | -                    | Usually include              |
| Venous thrombotic disease                                                 | 77.4                  | 82.4                  | -                    | Usually include              |
| Drug/alcohol misuse                                                       | 82.4                  | 81.8                  | -                    | Usually include              |
| Anaemia                                                                   | 75.0                  | 81.7                  | -                    | Usually include              |
| Chronic Lyme disease                                                      | -                     | 61.5                  | 81.3                 | Usually include              |
| Transient ischaemic attack                                                | 76.7                  | 80.4                  | -                    | Usually include              |
| Hypertension (treated)                                                    | 78.7                  | 80.4                  | -                    | Usually include              |
| Anxiety                                                                   | 86.5                  | 80.0                  | -                    | Usually include              |
| Treated cancer that requires surveillance                                 | -                     | -                     | 79.3                 | Usually include              |
| Eating disorders                                                          | 74.3                  | 79.1                  | -                    | Usually include              |
| Vision impairment or blindness that cannot be corrected with glasses      | 80.1                  | 78.6                  | -                    | Usually include              |
| Musculoskeletal problems due to injury                                    | 80.1                  | 78.6                  | 78.4                 | Usually include              |
| Tuberculosis                                                              | 82.4                  | 76.6                  | -                    | Usually include              |
| Gout                                                                      | 79.1                  | 76.1                  | -                    | Usually include              |
| Endometriosis                                                             | 73.6                  | 75.7                  | -                    | Usually include              |
| Chronic primary pain                                                      | 78.5                  | -                     | 75.3                 | Usually include              |
| Peptic ulcer                                                              | 79.7                  | 73.9                  | -                    | Usually include              |
| Hearing impairment or deafness that cannot be corrected with hearing aids | 70.9                  | 73.9                  | -                    | Usually include              |
| Post-acute COVID-19                                                       | -                     | 70.3                  | 73.4                 | Usually include              |
| Post-traumatic stress disorder                                            | 77.5                  | 73.4                  | -                    | Usually include              |

|                                           |      |      |      |                 |
|-------------------------------------------|------|------|------|-----------------|
| Psoriasis                                 | 77.0 | 73.4 | -    | Usually include |
| Benign cerebral tumours                   | -    | -    | 73.3 | Usually include |
| Peripheral neuropathy                     | 83.4 | 73.1 | -    | Usually include |
| Hypertension (untreated)                  | 73.6 | 73.0 | -    | Usually include |
| Sleep apnoea                              | 77.2 | 72.9 | -    | Usually include |
| Congenital disease                        | 79.7 | 72.6 | -    | Usually include |
| Chronic low back pain                     | -    | -    | 72.2 | Usually include |
| Chronic urinary tract infection           | 73.8 | 71.8 | -    | Usually include |
| Aneurysm                                  | -    | -    | 71.6 | Usually include |
| Meniere's disease                         | 63.0 | 71.3 | -    | Usually include |
| Migraine or other regular headache        | 68.9 | 71.3 | -    | Usually include |
| Osteoporosis                              | 77.3 | 70.3 | -    | Usually include |
| Autism                                    | 63.0 | 70.1 | -    | Usually include |
| Obsessive compulsive disorder             | 63.6 | 70.1 | -    | Usually include |
| Dissociative or personality disorders     | 69.8 | 69.4 | -    |                 |
| Glaucoma                                  | 72.8 | 69.4 | -    |                 |
| Urinary incontinence                      | 67.3 | 66.7 | -    |                 |
| Irritable bowel syndrome                  | 63.9 | 66.1 | -    |                 |
| Polycystic ovary syndrome                 | 66.9 | 65.4 | -    |                 |
| Chronic insomnia                          | 69.3 | 64.5 | -    |                 |
| Obesity                                   | 69.1 | 64.0 | -    |                 |
| Dyslipidaemia (treated)                   | 63.1 | 63.6 | -    |                 |
| Uterine (womb) problems                   | 71.0 | 63.1 | -    |                 |
| Cataract                                  | 62.2 | 63.1 | -    |                 |
| Gall bladder problems                     | 67.6 | 62.7 | -    |                 |
| Prostatic hypertrophy                     | 55.0 | 62.1 | -    |                 |
| Attention deficit hyperactivity disorder  | 56.9 | 60.2 | -    |                 |
| Somatiform disorders                      | 55.7 | 59.4 | -    |                 |
| Gastroesophageal reflux                   | 60.5 | 59.1 | -    |                 |
| Chronic urticaria                         | 59.6 | 58.7 | -    |                 |
| Malnutrition                              | 64.5 | 57.5 | -    |                 |
| High cholesterol (untreated)              | 63.9 | 57.3 | -    |                 |
| Learning disability                       | 53.3 | 55.1 | -    |                 |
| Kidney or bladder stones                  | 57.1 | 55.1 | -    |                 |
| Physical disability                       | 60.4 | 55.0 | -    |                 |
| Eczema                                    | 60.5 | 54.1 | -    |                 |
| Non-melanoma skin cancer                  | 54.5 | 53.7 | -    |                 |
| Chronic sinusitis                         | 54.1 | 53.6 | -    |                 |
| Chronic/allergic rhinitis                 | 58.2 | 53.2 | -    |                 |
| Diverticulosis                            | 69.7 | 50.0 | -    |                 |
| Chronic gum disease                       | 46.2 | 49.1 | -    |                 |
| Nicotine dependence                       | 42.9 | 48.1 | -    |                 |
| Sexual dysfunction                        | 42.0 | 46.7 | -    |                 |
| Edentulism                                | 38.8 | 41.1 | -    |                 |
| Smoking                                   | 45.6 | 37.8 | -    |                 |
| Social deprivation and poverty            | 41.0 | 36.6 | -    |                 |
| Infertility                               | 33.3 | 33.6 | -    |                 |
| Post-sepsis syndrome                      | 42.1 | 32.4 | -    |                 |
| Treatment burden                          | 27.3 | 31.8 | -    |                 |
| Dizziness                                 | 33.6 | 30.6 | -    |                 |
| Side effects of medications               | 28.9 | 29.4 | -    |                 |
| Chronic cough                             | 29.0 | 27.7 | -    |                 |
| Benign cancers                            | 35.9 | 26.2 | -    |                 |
| Sedentary lifestyle                       | 28.8 | 18.0 | -    |                 |
| Treated cancer not requiring surveillance | -    | -    | 21.5 |                 |

**Table S11: Public scores for ‘usually include’ (the sum of ‘always’ and ‘usually’)**

| Condition                                 | Round 1<br>N=25<br>% | Round 2<br>N=31<br>% | Round 3<br>N=25<br>% | Public panel<br>consensus |
|-------------------------------------------|----------------------|----------------------|----------------------|---------------------------|
| End-stage kidney disease                  | 96.0                 | 100.0                | -                    | Always include            |
| Heart failure                             | 100.0                | 96.8                 | -                    | Always include            |
| Dementia                                  | 92.0                 | 96.7                 | -                    | Always include            |
| Chronic liver disease                     | 100.0                | 100.0                | -                    | Always include            |
| Stroke                                    | 92.0                 | 96.8                 | -                    | Always include            |
| Chronic kidney disease                    | 100.0                | 100.0                | -                    | Always include            |
| Parkinson’s disease                       | 92.0                 | 96.8                 | -                    | Always include            |
| Multiple sclerosis                        | 100.0                | 100.0                | -                    | Always include            |
| Coronary artery disease                   | 96.0                 | 96.8                 | -                    | Always include            |
| Cystic fibrosis                           | 100.0                | 96.8                 | -                    | Always include            |
| Diabetes                                  | 92.0                 | 100.0                | -                    | Always include            |
| HIV/AIDS                                  | 91.7                 | 90.3                 | -                    | Always include            |
| Epilepsy                                  | 92.0                 | 100.0                | -                    | Always include            |
| Addison’s disease                         | -                    | 88.0                 | 95.8                 | Always include            |
| Metastatic cancers                        | 91.7                 | 96.7                 | -                    | Always include            |
| Haematological cancers                    | 91.7                 | 100.0                | -                    | Always include            |
| Solid organ cancers                       | 91.7                 | 100.0                | -                    | Always include            |
| Inflammatory bowel disease                | 100.0                | 100.0                | -                    | Usually include           |
| Heart valve disorders                     | 76.0                 | 100.0                | -                    | Usually include           |
| Melanoma                                  | 91.7                 | 100.0                | -                    | Usually include           |
| Chronic obstructive pulmonary disease     | 100.0                | 96.8                 | -                    | Usually include           |
| Peripheral artery disease                 | 88.0                 | 96.8                 | -                    | Usually include           |
| Venous thrombotic disease                 | 80.0                 | 96.8                 | -                    | Usually include           |
| Transient ischaemic attack                | 88.0                 | 96.8                 | -                    | Usually include           |
| Aneurysm                                  | -                    | 96.8                 | -                    | Usually include           |
| Pancreatic disease                        | 96.0                 | 96.7                 | -                    | Usually include           |
| Anaemia                                   | 60.0                 | 96.7                 | -                    | Usually include           |
| Peripheral neuropathy                     | 76.0                 | 96.7                 | -                    | Usually include           |
| Schizophrenia                             | 91.3                 | 93.5                 | -                    | Usually include           |
| Bipolar disorder                          | 95.7                 | 93.5                 | -                    | Usually include           |
| Connective tissue disease                 | 83.3                 | 93.3                 | -                    | Usually include           |
| Paralysis                                 | 84.0                 | 93.3                 | -                    | Usually include           |
| Post-acute COVID-19                       | -                    | 93.1                 | 92.0                 | Usually include           |
| Tuberculosis                              | 91.7                 | 90.3                 | -                    | Usually include           |
| Congenital disease                        | 88.0                 | 90.0                 | -                    | Usually include           |
| Prostatic hypertrophy                     | 58.3                 | 90.0                 | -                    | Usually include           |
| Endometriosis                             | 72.7                 | 89.3                 | -                    | Usually include           |
| Bronchiectasis                            | -                    | 87.1                 | 88.0                 | Usually include           |
| Osteoarthritis                            | 79.2                 | 87.1                 | -                    | Usually include           |
| Thyroid problems                          | 75.0                 | 87.1                 | -                    | Usually include           |
| Autism                                    | 63.6                 | 87.1                 | -                    | Usually include           |
| Chronic urinary tract infection           | 60.0                 | 86.7                 | -                    | Usually include           |
| Polycystic ovary syndrome                 | 72.7                 | 86.2                 | -                    | Usually include           |
| Arrhythmia                                | 68.0                 | 85.7                 | -                    | Usually include           |
| Peptic ulcer                              | 66.7                 | 83.9                 | -                    | Usually include           |
| Learning disability                       | 50.0                 | 83.9                 | -                    | Usually include           |
| Asthma                                    | 96.0                 | 80.6                 | -                    | Usually include           |
| Osteoporosis                              | 70.8                 | 80.6                 | -                    | Usually include           |
| Uterine (womb) problems                   | 63.6                 | 80.6                 | -                    | Usually include           |
| Treated cancer that requires surveillance | -                    | -                    | 80.0                 | Usually include           |
| Chronic primary pain                      | 76.0                 | -                    | 80.0                 | Usually include           |
| Malnutrition                              | 57.1                 | 80.0                 | -                    | Usually include           |
| Non-melanoma skin cancer                  | 69.6                 | 80.0                 | -                    | Usually include           |
| Chronic Lyme disease                      | -                    | 83.9                 | 79.2                 | Usually include           |

|                                                                           |      |      |      |                 |
|---------------------------------------------------------------------------|------|------|------|-----------------|
| Depression                                                                | 87.5 | 77.4 | -    | Usually include |
| Irritable bowel syndrome                                                  | 68.0 | 76.7 | -    | Usually include |
| Kidney or bladder stones                                                  | 52.0 | 76.7 | -    | Usually include |
| Benign cerebral tumours                                                   | 58.3 | -    | 76.0 | Usually include |
| Diverticulosis                                                            | 62.5 | 75.9 | -    | Usually include |
| Drug/alcohol misuse                                                       | 78.3 | 74.2 | -    | Usually include |
| Eating disorders                                                          | 72.0 | 74.2 | -    | Usually include |
| Vision impairment or blindness that cannot be corrected with glasses      | 58.3 | 74.2 | -    | Usually include |
| Hearing impairment or deafness that cannot be corrected with hearing aids | 65.2 | 74.2 | -    | Usually include |
| Post-traumatic stress disorder                                            | 64.0 | 74.2 | -    | Usually include |
| Dyslipidaemia (treated)                                                   | 70.8 | 74.2 | -    | Usually include |
| Physical disability                                                       | 79.2 | 74.2 | -    | Usually include |
| Hypertension (untreated)                                                  | 75.0 | 71.0 | -    | Usually include |
| Meniere's disease                                                         | 81.0 | 71.0 | -    | Usually include |
| Dissociative or personality disorders                                     | 70.8 | 71.0 | -    | Usually include |
| Musculoskeletal problems due to injury                                    | 69.6 | 67.7 | 70.8 | Usually include |
| Glaucoma                                                                  | 58.3 | 70.0 | -    | Usually include |
| Gall bladder problems                                                     | 62.5 | 70.0 | -    | Usually include |
| Sleep apnoea                                                              | 47.6 | 67.7 | -    |                 |
| Obsessive compulsive disorder                                             | 41.7 | 67.7 | -    |                 |
| Urinary incontinence                                                      | 50.0 | 67.7 | -    |                 |
| Chronic/allergic rhinitis                                                 | 41.7 | 67.7 | -    |                 |
| Gout                                                                      | 54.2 | 64.5 | -    |                 |
| Psoriasis                                                                 | 58.3 | 64.5 | -    |                 |
| Obesity                                                                   | 47.6 | 61.3 | -    |                 |
| Attention deficit hyperactivity disorder                                  | 45.0 | 61.3 | -    |                 |
| Somatoform disorders                                                      | 83.3 | 58.6 | -    |                 |
| Hypertension (treated)                                                    | 62.5 | 56.7 | -    |                 |
| Anxiety                                                                   | 52.2 | 56.7 | -    |                 |
| Benign cancers                                                            | 58.3 | 55.2 | -    |                 |
| Migraine or other regular headache                                        | 56.0 | 54.8 | -    |                 |
| Gastroesophageal reflux                                                   | 45.8 | 54.8 | -    |                 |
| Eczema                                                                    | 66.7 | 54.8 | -    |                 |
| Post-sepsis syndrome                                                      | -    | 53.6 | -    |                 |
| Chronic low back pain                                                     | 41.7 | -    | 52.0 |                 |
| Cataract                                                                  | 29.2 | 51.6 | -    |                 |
| Treatment burden                                                          | 41.7 | 50.0 | -    |                 |
| Side effects of medications                                               | 39.1 | 50.0 | -    |                 |
| Social deprivation and poverty                                            | 44.0 | 46.7 | -    |                 |
| Chronic sinusitis                                                         | 40.9 | 45.2 | -    |                 |
| Nicotine dependence                                                       | 66.7 | 45.2 | -    |                 |
| High cholesterol (untreated)                                              | 34.8 | 41.9 | -    |                 |
| Smoking                                                                   | 54.5 | 41.9 | -    |                 |
| Chronic insomnia                                                          | 43.5 | 40.0 | -    |                 |
| Chronic urticaria                                                         | 34.8 | 37.9 | -    |                 |
| Chronic gum disease                                                       | 54.2 | 35.5 | -    |                 |
| Chronic cough                                                             | 13.0 | 35.5 | -    |                 |
| Sedentary lifestyle                                                       | 45.5 | 35.5 | -    |                 |
| Sexual dysfunction                                                        | 25.0 | 34.5 | -    |                 |
| Edentulism                                                                | 47.8 | 32.3 | -    |                 |
| Dizziness                                                                 | 45.5 | 32.3 | -    |                 |
| Infertility                                                               | -    | 27.6 | -    |                 |
| Treated cancer not requiring surveillance                                 | -    | -    | 24.0 |                 |

**Table S12: Conditions not recommended to 'always include' or 'usually include' by both panels**

| Condition                                               | Professional panel (%) | Public panel (%) | Both panels (difficulty parameter, logit) | Final consensus  |
|---------------------------------------------------------|------------------------|------------------|-------------------------------------------|------------------|
| <b>Consensus to usually include in one panel (n=22)</b> |                        |                  |                                           |                  |
| Hypertension (treated)                                  | 80.4 (R2)              | 56.7 (R2)        | 0.3 (R2)                                  | Usually include* |
| Anxiety                                                 | 80.0 (R2)              | 56.7 (R2)        | 0.4 (R2)                                  | Usually include* |
| Gout                                                    | 76.1 (R2)              | 64.5 (R2)        | 0.4 (R2)                                  | Usually include* |
| Psoriasis                                               | 73.4 (R2)              | 64.5 (R2)        | 0.6 (R2)                                  | No consensus     |
| Sleep apnoea                                            | 72.9 (R2)              | 67.7 (R2)        | 0.6 (R2)                                  | No consensus     |
| Obsessive compulsive disorder                           | 70.1 (R2)              | 67.7 (R2)        | 0.7 (R2)                                  | No consensus     |
| Prostatic hypertrophy                                   | 62.1 (R2)              | 90.0 (R2)        | 0.7 (R2)                                  | No consensus     |
| Polycystic ovary syndrome                               | 65.4 (R2)              | 86.2 (R2)        | 0.7 (R2)                                  | No consensus     |
| Dissociative or personality disorders                   | 69.4 (R2)              | 71.0 (R2)        | 0.7 (R2)                                  | No consensus     |
| Glaucoma                                                | 69.4 (R2)              | 70.0 (R2)        | 0.7 (R2)                                  | No consensus     |
| Chronic low back pain                                   | 72.2 (R3)              | 52.0 (R3)        | 0.8 (R3)                                  | No consensus     |
| Migraine                                                | 71.3 (R2)              | 54.8 (R2)        | 0.8 (R2)                                  | No consensus     |
| Uterine (womb) problems                                 | 63.1 (R2)              | 80.0 (R2)        | 0.8 (R2)                                  | No consensus     |
| Irritable bowel syndrome                                | 66.1 (R2)              | 76.7 (R2)        | 0.8 (R2)                                  | No consensus     |
| Gall bladder problems                                   | 62.7 (R2)              | 70.0 (R2)        | 1.0 (R2)                                  | No consensus     |
| Malnutrition                                            | 57.5 (R2)              | 80.0 (R2)        | 1.1 (R2)                                  | No consensus     |
| Learning disability                                     | 55.1 (R2)              | 83.9 (R2)        | 1.2 (R2)                                  | No consensus     |
| Kidney or bladder stones                                | 55.1 (R2)              | 76.7 (R2)        | 1.2 (R2)                                  | No consensus     |
| High cholesterol (untreated)                            | 57.3 (R2)              | 74.2 (R2)        | 1.2 (R2)                                  | No consensus     |
| Non-melanoma skin cancer                                | 53.7 (R2)              | 80.6 (R2)        | 1.3 (R2)                                  | No consensus     |
| Physical disability                                     | 55.0 (R2)              | 74.2 (R2)        | 1.3 (R2)                                  | No consensus     |
| Diverticulosis                                          | 50.0 (R2)              | 75.9 (R2)        | 1.5 (R2)                                  | No consensus     |
| <b>No consensus in either panel (n=27)</b>              |                        |                  |                                           |                  |
| Urinary incontinence                                    | 66.7 (R2)              | 67.7 (R2)        | 0.9 (R2)                                  | No consensus     |
| Obesity                                                 | 64.0 (R2)              | 61.3 (R2)        | 1.0 (R2)                                  | No consensus     |
| Cataract                                                | 63.1 (R2)              | 51.6 (R2)        | 1.2 (R2)                                  | No consensus     |
| Attention deficit hyperactivity disorder                | 60.2 (R2)              | 61.3 (R2)        | 1.2 (R2)                                  | No consensus     |
| Gastroesophageal reflux                                 | 59.1 (R2)              | 54.8 (R2)        | 1.3 (R2)                                  | No consensus     |
| Chronic insomnia                                        | 64.5 (R2)              | 40.0 (R2)        | 1.3 (R2)                                  | No consensus     |
| Dyslipidaemia (treated)                                 | 63.6 (R2)              | 41.9 (R2)        | 1.3 (R2)                                  | No consensus     |
| Somatoform disorders                                    | 59.4 (R2)              | 58.6 (R2)        | 1.3 (R2)                                  | No consensus     |
| Chronic/Allergic rhinitis                               | 53.2 (R2)              | 67.7 (R2)        | 1.4 (R2)                                  | No consensus     |
| Eczema                                                  | 54.1 (R2)              | 54.8 (R2)        | 1.5 (R2)                                  | No consensus     |
| Chronic urticarial (chronic hives)                      | 58.7 (R2)              | 37.9 (R2)        | 1.6 (R2)                                  | No consensus     |
| Chronic sinusitis                                       | 53.6 (R2)              | 45.2 (R2)        | 1.7 (R2)                                  | No consensus     |
| Chronic gum disease                                     | 49.1 (R2)              | 35.5 (R2)        | 1.9 (R2)                                  | No consensus     |
| Nicotine dependence                                     | 48.1 (R2)              | 45.2 (R2)        | 2.0 (R2)                                  | No consensus     |
| Sexual dysfunction                                      | 46.7 (R2)              | 34.5 (R2)        | 2.1 (R2)                                  | No consensus     |
| Edentulism                                              | 41.1 (R2)              | 32.3 (R2)        | 2.3 (R2)                                  | No consensus     |
| Smoking                                                 | 37.8 (R2)              | 41.9 (R2)        | 2.4 (R2)                                  | No consensus     |
| Social deprivation and poverty                          | 36.6 (R2)              | 46.7 (R2)        | 2.4 (R2)                                  | No consensus     |
| Post-sepsis syndrome                                    | 32.4 (R2)              | 53.6 (R2)        | 2.5 (R2)                                  | No consensus     |
| Treatment burden                                        | 31.8 (R2)              | 50.0 (R2)        | 2.5 (R2)                                  | No consensus     |
| Benign cancers                                          | 26.2 (R2)              | 55.2 (R2)        | 2.7 (R2)                                  | No consensus     |
| Infertility                                             | 33.6 (R2)              | 27.6 (R2)        | 2.7 (R2)                                  | No consensus     |
| Side effects of medications                             | 29.4 (R2)              | 50.0 (R2)        | 2.8 (R2)                                  | No consensus     |
| Chronic cough                                           | 27.7 (R2)              | 35.5 (R2)        | 2.9 (R2)                                  | No consensus     |
| Dizziness                                               | 30.6 (R2)              | 32.3 (R2)        | 2.9 (R2)                                  | No consensus     |
| Treated cancer not requiring surveillance               | 21.5 (R3)              | 24.0 (R3)        | 3.4 (R3)                                  | No consensus     |
| Sedentary lifestyle                                     | 18.0 (R2)              | 35.5 (R2)        | 3.4 (R2)                                  | No consensus     |

\* Consensus to 'usually include' in one panel and difficulty parameter across both panels  $\leq 0.5$

**Table S13: Differential item functioning (used to examine which condition-choice items were more likely to be endorsed by panelists with varying interest in different populations [4])**

| Subgroup                                                                                                                                         | Condition                                | Group 1 (b parameter, logit) | Group 0 (b parameter, logit) | Z-statistic | p-value     |
|--------------------------------------------------------------------------------------------------------------------------------------------------|------------------------------------------|------------------------------|------------------------------|-------------|-------------|
| Panelists specifically interested in multimorbidity in women (group1) versus those not specifically interested (group 0)                         | Anaemia                                  | -0.6                         | -0.2                         | -0.7        | 0.51        |
|                                                                                                                                                  | Depression                               | -1.0                         | -1.8                         | 0.9         | 0.35        |
|                                                                                                                                                  | Anxiety                                  | 0.04                         | -0.1                         | 0.3         | 0.78        |
|                                                                                                                                                  | Dementia                                 | -1.9                         | -2.8                         | 0.9         | 0.35        |
|                                                                                                                                                  | Eating disorder                          | -0.3                         | 0.06                         | -0.5        | 0.62        |
|                                                                                                                                                  | Osteoarthritis                           | -1.5                         | -0.3                         | -1.5        | 0.14        |
|                                                                                                                                                  | Osteoporosis                             | 0.04                         | 0.7                          | -1.2        | 0.25        |
|                                                                                                                                                  | Connective tissue disease                | -2.6                         | -2.8                         | 0.2         | 0.86        |
|                                                                                                                                                  | Endometriosis                            | 0.08                         | 0.3                          | -0.3        | 0.78        |
|                                                                                                                                                  | Chronic urinary tract infection          | 0.3                          | 0.5                          | -0.4        | 0.71        |
|                                                                                                                                                  | Polycystic ovary syndrome                | 0.9                          | 0.9                          | -0.004      | 1.0         |
|                                                                                                                                                  | Urinary incontinence                     | 0.3                          | 1.0                          | -1.2        | 0.25        |
|                                                                                                                                                  | Uterus (womb) problems                   | 1.0                          | 1.0                          | 0.004       | 1.0         |
| Panelists specifically interested in multimorbidity in children (group1) versus those not specifically interested (group 0)                      | Anxiety                                  | -0.8                         | 0.01                         | -0.9        | 0.37        |
|                                                                                                                                                  | Depression                               | -0.8                         | -1.7                         | 1.0         | 0.32        |
|                                                                                                                                                  | Drug/Alcohol misuse                      | -0.8                         | -0.2                         | -0.7        | 0.50        |
|                                                                                                                                                  | Eating disorder                          | -0.2                         | 0.02                         | -0.2        | 0.83        |
|                                                                                                                                                  | Autism                                   | -0.8                         | 0.8                          | -1.8        | 0.07        |
|                                                                                                                                                  | Learning disability                      | 1.4                          | 1.5                          | -0.08       | 0.94        |
|                                                                                                                                                  | Attention deficit hyperactivity disorder | -0.2                         | 1.4                          | <b>-2.0</b> | <b>0.04</b> |
|                                                                                                                                                  | Haematological cancers                   | -1.8                         | -1.9                         | 0.01        | 1.0         |
|                                                                                                                                                  | Benign brain tumour                      | 2.9                          | 3.2                          | -0.4        | 0.65        |
|                                                                                                                                                  | Epilepsy                                 | -1.0                         | -2.4                         | 1.5         | 0.12        |
|                                                                                                                                                  | Cystic fibrosis                          | -1.8                         | -1.3                         | -0.5        | 0.61        |
|                                                                                                                                                  | Congenital diseases                      | -0.08                        | 0.5                          | -0.7        | 0.46        |
|                                                                                                                                                  | Asthma                                   | -1.8                         | -1.6                         | -0.2        | 0.84        |
| Panelists specifically interested in multimorbidity in socially-deprived populations (group1) versus those not specifically interested (group 0) | Anxiety                                  | -0.7                         | 0.4                          | -2.1        | 0.04        |
|                                                                                                                                                  | Depression                               | -1.5                         | -2.0                         | 0.6         | 0.56        |
|                                                                                                                                                  | Schizophrenia                            | -1.5                         | -2.6                         | 1.4         | 0.15        |
|                                                                                                                                                  | Drug/Alcohol misuse                      | -0.4                         | -0.2                         | -0.4        | 0.71        |
|                                                                                                                                                  | Nicotine dependence                      | 1.6                          | 1.9                          | -0.6        | 0.52        |
|                                                                                                                                                  | Post-traumatic stress disorder           | 0.3                          | 0.4                          | -0.2        | 0.85        |
|                                                                                                                                                  | Bipolar disorder                         | -1.2                         | -1.1                         | -0.1        | 0.91        |
|                                                                                                                                                  | Chronic liver disease                    | -3.4                         | -3.0                         | 0.4         | 0.69        |
|                                                                                                                                                  | HIV/AIDS                                 | -2.0                         | -2.1                         | 0.2         | 0.88        |



| Subgroup | Condition    | Group 1 (b parameter, logit) | Group 0 (b parameter, logit) | Z-statistic | p-value |
|----------|--------------|------------------------------|------------------------------|-------------|---------|
|          | Tuberculosis | 0.07                         | 0.01                         | 0.1         | 0.91    |

p-value larger than 0.05 indicates that there is no statistical difference between group 1 and group 0. A positive value for the z-statistic indicates that group 0 is more likely to endorse the condition than group 1.

**Table S14: Level of endorsement of the condition-related items**

| Condition                                    | Difficulty parameter (log(odds), 95% Confidence Interval) |                                  |                              |
|----------------------------------------------|-----------------------------------------------------------|----------------------------------|------------------------------|
|                                              | Professional panel                                        | Public panel                     | Both panels combined         |
| <b>System domain</b>                         |                                                           |                                  |                              |
| Cardiovascular diseases                      | <b>-4.2 (-6.1 to -2.2)</b>                                | <b>-1.0 (-2.2 to 0.2)</b>        | <b>-2.8 (-3.8 to -1.8)</b>   |
| Respiratory diseases                         | <b>-3.8 (-5.8 to -1.8)</b>                                | <b>endorsed by all panelists</b> | <b>-3.9 (-5.9 to -2.0)</b>   |
| Neurological diseases                        | <b>-3.4 (-4.9 to -2.0)</b>                                | <b>-1.5 (-2.9 to -0.03)</b>      | <b>-2.8 (-3.8 to -1.8)</b>   |
| Metabolic and endocrine                      | <b>-2.7 (-3.7 to -1.7)</b>                                | <b>-1.0 (-2.2 to 0.2)</b>        | <b>-2.2 (-3.0 to -1.4)</b>   |
| Mental health                                | <b>-2.2 (-3.1 to -1.4)</b>                                | <b>-0.2 (-1.1 to 0.8)</b>        | <b>-1.6 (-2.2 to -0.9)</b>   |
| Haematological disorders                     | <b>-2.0 (-3.0 to -1.1)</b>                                | <b>-1.0 (-2.2 to 0.2)</b>        | <b>-1.7 (-2.5 to -1.0)</b>   |
| Cancers                                      | <b>-1.9 (-2.7 to 1.2)</b>                                 | <b>-1.5 (-2.9 to -0.03)</b>      | <b>-1.8 (-2.4 to -1.1)</b>   |
| Musculoskeletal diseases                     | <b>-1.6 (-2.3 to 1.0)</b>                                 | <b>-0.7 (-1.8 to 0.4)</b>        | <b>-1.4 (-2.0 to -0.8)</b>   |
| Digestive diseases                           | <b>-1.1 (-1.8 to -0.4)</b>                                | <b>-1.0 (-2.2 to 0.2)</b>        | <b>-1.0 (-1.6 to -0.4)</b>   |
| Chronic infections                           | <b>-1.2 (-1.9 to -0.5)</b>                                | 0.3 (-0.6 to 1.1)*               | <b>-0.7 (-1.2 to -0.2)</b>   |
| Urogenital disorders                         | <b>-0.8 (-1.4 to -0.1)</b>                                | <b>-0.7 (-1.8 to 0.4)</b>        | <b>-0.7 (-1.2 to -0.2)</b>   |
| Eye diseases                                 | <b>0.05 (-0.5 to 0.6)</b>                                 | 0.3 (-0.6 to 1.1)*               | 0.1 (-0.3 to 0.6)*           |
| Ear, Nose and Throat disorders               | 0.3 (-0.2 to 0.8)*                                        | <b>-0.2 (-1.1 to 0.8)</b>        | 0.2 (-0.2 to 0.7)*           |
| Oral disorders                               | 0.4 (-0.05 to 0.9)*                                       | 0.1 (-0.8 to 1.0)*               | 0.4 (-0.02 to 0.8)*          |
| Skin disorders                               | 0.5 (0.02 to 1.0)*                                        | 0.1 (-0.8 to 1.0)*               | 0.4 (-0.02 to 0.9)*          |
| <b>Mental health and behaviour disorders</b> |                                                           |                                  |                              |
| Dementia                                     | <b>-2.4 (-3.4 to -1.5)</b>                                | <b>-2.2 (-4.2 to -0.2)</b>       | <b>-2.3 (-3.2 to -1.5)</b>   |
| Schizophrenia                                | <b>-1.7 (-2.4 to -1.0)</b>                                | <b>-1.5 (-2.9 to -0.03)</b>      | <b>-1.6 (-2.2 to -1.0)</b>   |
| Depression                                   | <b>-1.5 (-2.3 to -0.7)</b>                                | <b>0.1 (-0.8 to 1.0)</b>         | <b>-0.9 (-1.5 to -0.4)</b>   |
| Bipolar disorder                             | <b>-1.0 (-1.7 to -0.3)</b>                                | <b>-1.5 (-2.9 to -0.03)</b>      | <b>-1.1 (-1.7 to -0.5)</b>   |
| Anxiety                                      | <b>-0.02 (-0.6 to 0.5)</b>                                | 1.2 (0.4 to 1.9)                 | 0.4 (-0.08 to 0.8)*          |
| Drug/Alcohol misuse                          | <b>-0.2 (-0.7 to 0.4)</b>                                 | 0.3 (-0.6 to 1.1)*               | <b>-0.02 (-0.5 to 0.4)</b>   |
| Eating disorder                              | 0.1 (-0.5 to 0.6)*                                        | 0.3 (-0.6 to 1.1)*               | 0.2 (-0.3 to 0.6)*           |
| Post-traumatic stress disorder               | 0.5 (-0.002 to 1.0)*                                      | 0.3 (-0.6 to 1.1)*               | 0.5 (0.05 to 0.9)*           |
| Dissociative or personality disorder         | 0.7 (0.3 to 1.2)                                          | 0.4 (-0.4 to 1.3)*               | 0.7 (0.3 to 1.1)             |
| Chronic insomnia                             | 1.0 (0.6 to 1.5)                                          | 1.9 (1.1 to 2.8)                 | 1.3 (0.9 to 1.7)             |
| Autism                                       | 0.7 (0.2 to 1.2)                                          | <b>-0.7 (-1.8 to 0.4)</b>        | 0.5 (0.03 to 0.9)*           |
| Obsessive compulsive disorder                | 0.5 (0.2 to 1.2)*                                         | 0.6 (0.2 to 1.4)                 | 0.7 (0.3 to 1.1)             |
| Attention deficit hyperactivity disorder     | 1.3 (0.8 to 1.7)                                          | 1.4 (0.7 to 2.2)                 | 1.2 (0.8 to 1.6)             |
| Somatoform disorders                         | 1.3 (0.9 to 1.8)                                          | 1.0 (0.2 to 1.7)                 | 1.3 (0.9 to 1.7)             |
| Learning disability                          | 1.5 (1.1 to 2.0)                                          | <b>-0.4 (-1.4 to 0.6)</b>        | 1.2 (0.8 to 1.5)             |
| Nicotine dependence                          | 1.9 (1.5 to 2.3)                                          | 1.8 (1.0 to 2.5)                 | 1.9 (1.5 to 2.3)             |
| <b>Cardiovascular diseases</b>               |                                                           |                                  |                              |
| Heart failure                                | <b>-3.4 (-4.9 to -2.0)</b>                                | <b>-2.2 (-4.2 to -0.2)</b>       | <b>-3.1 (-4.3 to -2.0)</b>   |
| Coronary heart diseases                      | <b>-2.7 (-3.7 to -1.7)</b>                                | <b>-2.2 (-4.2 to -0.2)</b>       | <b>-2.6 (-3.5 to -1.6)</b>   |
| Stroke                                       | <b>-2.7 (-3.7 to -1.7)</b>                                | <b>-2.2 (-4.2 to -0.2)</b>       | <b>-2.6 (-3.5 to -1.6)</b>   |
| Peripheral artery diseases                   | <b>-1.5 (-2.2 to -0.9)</b>                                | <b>-2.2 (-4.2 to -0.2)</b>       | <b>-1.6 (-2.2 to -0.9)</b>   |
| Arrhythmia                                   | <b>-0.4 (-1.0 to 0.2)</b>                                 | <b>-0.6 (1.7 to 0.5)</b>         | <b>-0.4 (-0.9 to 0.1)</b>    |
| Heart valve disorders                        | <b>-0.3 (-0.8 to 0.2)</b>                                 | <b>endorsed by all panelists</b> | <b>-1.6 (-2.3 to -0.9)</b>   |
| Venous thrombotic disease                    | <b>-0.3 (-0.8 to -0.3)</b>                                | <b>-2.2 (-4.2 to -0.2)</b>       | <b>-0.5 (-1.0 to -0.003)</b> |
| Hypertension (treated)                       | <b>-0.1 (-0.6 to 0.4)</b>                                 | 1.2 (0.4 to 2.0)                 | 0.3 (-0.1 to 0.7)*           |

|                                                      |                             |                                  |                            |
|------------------------------------------------------|-----------------------------|----------------------------------|----------------------------|
| Hypertension (untreated)                             | 0.4 (-0.05 to 0.9)*         | 0.4 (-0.4 to 1.3)*               | 0.4 (-0.1 to 0.9)*         |
| Aneurysm                                             | 0.6 (0.05 to 1.1)           | <b>-2.2 (-4.2 to -0.2)</b>       | 0.5 (0.1 to 0.9)*          |
| Dyslipidaemia (treated)                              | 1.0 (0.6 to 1.5)            | 1.9 (1.1 to 2.7)                 | 1.3 (0.9 to 1.7)           |
| High cholesterol (untreated)                         | 1.4 (0.9 to 1.8)            | 0.4 (-0.4 to 1.3)*               | 1.2 (0.8 to 1.5)           |
| <b>Disorders of the blood</b>                        |                             |                                  |                            |
| Anaemia                                              | <b>-0.2 (-0.7 to 0.4)</b>   | <b>-2.2 (-4.2 to -0.2)</b>       | <b>-0.4 (-0.9 to 0.08)</b> |
| <b>Cancers</b>                                       |                             |                                  |                            |
| Solid organ cancers                                  | <b>-1.9 (-2.6 to -1.1)</b>  | <b>endorsed by all panelists</b> | <b>-2.0 (-2.7 to -1.3)</b> |
| Haematological cancers                               | <b>-1.7 (-2.5 to -1.0)</b>  | <b>endorsed by all panelists</b> | <b>-1.9 (-2.6 to -1.2)</b> |
| Metastatic cancers                                   | <b>-1.3 (-1.9 to -0.6)</b>  | <b>-2.2 (-4.2 to -0.2)</b>       | <b>-1.3 (-1.9 to -0.7)</b> |
| Melanoma                                             | <b>-0.8 (-1.5 to -0.2)</b>  | <b>endorsed by all panelists</b> | <b>-1.1 (-1.7 to -0.5)</b> |
| Treated cancers requiring surveillance               | <b>-0.04 (-0.6 to 0.5)</b>  | 0.03 (-1.0 to 1.1)*              | 0.01 (-0.5 to 0.5)*        |
| Benign cerebral tumours                              | 0.3 (-0.2 to 0.9)*          | 0.3 (-0.7 to 1.3)*               | 0.4 (-0.1 to 0.8)*         |
| Non-melanoma skin cancers                            | 1.6 (1.2 to 2.0)            | <b>-0.1 (-1.0 to 0.9)</b>        | 1.3 (0.9 to 1.7)           |
| Benign cancers                                       | 3.2 (2.7 to 3.7)            | 1.3 (0.5 to 2.1)                 | 2.7 (2.3 to 3.1)           |
| Treated cancer not requiring surveillance            | 3.4 (2.9 to 4.0)            | 3.1 (2.1 to 4.1)                 | 3.4 (2.9 to 3.9)           |
| <b>Neurological diseases</b>                         |                             |                                  |                            |
| Parkinson's disease                                  | <b>-3.0 (-4.2 to -1.8)</b>  | <b>-2.2 (-4.2 to -0.2)</b>       | <b>-2.8 (-3.8 to -1.8)</b> |
| Epilepsy                                             | <b>-2.1 (-2.9 to -1.3)</b>  | <b>endorsed by all panelists</b> | <b>-2.2 (-3.0 to -1.4)</b> |
| Multiple sclerosis                                   | <b>-1.8 (-2.5 to -1.1)</b>  | <b>endorsed by all panelists</b> | <b>-1.9 (-2.6 to -1.2)</b> |
| Paralysis                                            | <b>-0.9 (-1.5 to -0.3)</b>  | <b>-1.4 (-2.9 to 0.01)</b>       | <b>-0.9 (-1.4 to -0.4)</b> |
| Transient ischaemic attack                           | <b>-0.1 (-0.6 to 0.4)</b>   | <b>-2.2 (-4.2 to -0.2)</b>       | <b>-0.4 (-0.8 to 0.1)</b>  |
| Chronic primary pain                                 | 0.2 (-0.3 to 0.8)*          | 0.003 (-1.0 to 1.1)*             | 0.2 (-0.2 to 0.7)*         |
| Peripheral neuropathy                                | 0.5 (-0.02 to 1.0)*         | <b>-2.2 (-4.2 to -0.2)</b>       | 0.1 (-0.3 to 0.6)*         |
| Sleep apnoea                                         | 0.5 (-0.3 to 1.0)*          | 0.6 (-0.2 to 1.4)                | 0.6 (0.2 to 1.0)           |
| Migraine                                             | 0.5 (0.1 to 1.1)*           | 1.3 (0.5 to 2.1)                 | 0.8 (0.4 to 1.2)           |
| <b>Metabolic and endocrine disorders</b>             |                             |                                  |                            |
| Diabetes                                             | <b>-3.4 (-4.9 to -2.0)</b>  | <b>endorsed by all panelists</b> | <b>-3.5 (-4.9 to -2.1)</b> |
| Cystic fibrosis                                      | <b>-1.2 (-1.8 to -0.6)</b>  | <b>-2.2 (-4.2 to -0.2)</b>       | <b>-1.3 (-1.9 to -0.7)</b> |
| Thyroid disorders                                    | <b>-0.3 (-0.9 to 0.3)</b>   | <b>-0.7 (-1.8 to 0.4)</b>        | <b>-0.3 (-0.8 to 0.2)</b>  |
| Addison's disease                                    | <b>-0.6 (-1.3 to 0.1)</b>   | <b>-1.7 (-3.8 to 0.3)</b>        | <b>-0.8 (-1.4 to 0.1)</b>  |
| Malnutrition                                         | 1.4 (0.9 to 1.8)            | <b>-0.1 (-1.0 to 0.9)</b>        | 1.1 (0.7 to 1.5)           |
| <b>Musculoskeletal diseases</b>                      |                             |                                  |                            |
| Connective tissue disease                            | <b>-3.4 (-4.8 to -2.0)</b>  | <b>-1.4 (-2.9 to 0.01)</b>       | <b>-2.3 (-3.1 to -1.5)</b> |
| Osteoarthritis                                       | <b>-0.5 (-1.0 to 0.1)</b>   | <b>-0.7 (-1.8 to 0.4)</b>        | <b>-0.5 (-1.0 to 0.04)</b> |
| Long-term musculoskeletal impairment due to injuries | 0.01 (-0.5 to 0.6)*         | 0.6 (-0.3 to 1.6)                | 0.2 (-0.3 to 0.7)*         |
| Gout                                                 | 0.2 (-0.3 to 0.7)*          | 0.8 (-0.009 to 1.6)              | 0.4 (0.01 to 0.9)*         |
| Chronic low back pain                                | 0.5 (-0.1 to 1.0)*          | 1.6 (0.7 to 2.4)                 | 0.8 (0.3 to 1.2)           |
| Osteoporosis                                         | 0.6 (0.2 to 1.1)            | <b>-0.2 (-1.1 to 0.8)</b>        | 0.5 (0.08 to 0.9)*         |
| <b>Respiratory diseases</b>                          |                             |                                  |                            |
| Chronic obstructive pulmonary disease                | <b>-3.4 (-4.8 to -2.0)</b>  | <b>-2.2 (-4.2 to -0.2)</b>       | <b>-3.1 (-4.2 to -1.9)</b> |
| Asthma                                               | <b>-1.5 (-2.2 to -0.9)</b>  | <b>0.2 (-1.1 to 0.8)</b>         | <b>-1.1 (-1.7 to -0.6)</b> |
| Bronchiectasis                                       | <b>-0.7 (-1.3 to 0.001)</b> | <b>-1.1 (-2.6 to 0.4)</b>        | <b>-0.7 (-1.3 to -0.1)</b> |
| Post-acute COVID-19                                  | 0.4 (-0.2 to 0.9)*          | <b>-0.6 (-1.9 to 0.6)</b>        | 0.2 (-0.3 to 0.7)*         |
| Chronic/Allergic rhinitis                            | 1.6 (1.2 to 2.0)            | 0.6 (-0.2 to 1.4)                | 1.4 (1.0 to 1.8)           |

|                                                               |                            |                                  |                            |
|---------------------------------------------------------------|----------------------------|----------------------------------|----------------------------|
| <b>Infectious diseases</b>                                    |                            |                                  |                            |
| HIV/AIDS                                                      | <b>-1.7 (-2.5 to -1.0)</b> | <b>-1.0 (-2.2 to 0.2)</b>        | <b>-1.5 (-2.2 to -0.9)</b> |
| Chronic Lyme disease                                          | <b>-0.1 (0.7 to 0.5)</b>   | 0.2 (-0.9 to 1.2)*               | <b>-0.03 (-0.5 to 0.5)</b> |
| Tuberculosis                                                  | 0.2 (-0.3 to 0.7)*         | <b>-1.0 (-2.2 to 0.2)</b>        | 0.07 (-0.4 to 0.5)*        |
| <b>Digestive diseases</b>                                     |                            |                                  |                            |
| Chronic liver diseases                                        | <b>-3.4 (-4.8 to -2.0)</b> | <b>endorsed by all panelists</b> | <b>-3.5 (-4.9 to -2.1)</b> |
| Inflammatory bowel disease                                    | <b>-1.8 (-2.5 to -1.0)</b> | <b>endorsed by all panelists</b> | <b>-1.9 (-2.6 to -1.2)</b> |
| Pancreatic disease                                            | <b>-0.4 (-1.0 to 0.1)</b>  | <b>-2.2 (-4.2 to -0.2)</b>       | <b>-0.7 (-1.2 to -0.1)</b> |
| Peptic ulcer                                                  | 0.4 (-1.0 to 0.9)*         | <b>-0.4 (-1.4 to 0.6)</b>        | 0.3 (-0.2 to 0.7)*         |
| Irritable bowel syndrome                                      | 0.9 (0.4 to 1.4)           | 0.1 (-0.8 to 1.0)*               | 0.8 (0.4 to 1.2)           |
| Gall bladder disorders                                        | 1.1 (0.6 to 1.5)           | 0.5 (-0.3 to 1.4)*               | 1.0 (0.6 to 1.4)           |
| Gastroesophageal reflux                                       | 1.3 (0.9 to 1.7)           | 1.3 (0.5 to 2.1)                 | 1.3 (0.9 to 1.7)           |
| Diverticulosis                                                | 1.8 (1.4 to 2.3)           | 0.1 (-0.8 to 1.0)*               | 1.5 (1.1 to 1.9)           |
| <b>Urogenital diseases</b>                                    |                            |                                  |                            |
| Chronic kidney disease                                        | <b>-2.7 (-3.7 to -1.7)</b> | <b>endorsed by all panelists</b> | <b>-2.8 (-3.8 to -1.8)</b> |
| End-stage kidney disease                                      | <b>-1.9 (-2.6 to -1.1)</b> | <b>endorsed by all panelists</b> | <b>-2.0 (-2.7 to -1.2)</b> |
| Endometriosis                                                 | 0.3 (-0.2 to 0.8)*         | <b>-0.7 (-2.0 to 0.5)</b>        | 0.1 (-0.3 to 0.6)*         |
| Chronic urinary tract infection                               | 0.5 (-0.05 to 1.0)*        | <b>-0.6 (-1.7 to 0.4)</b>        | 0.3 (-0.1 to 0.8)*         |
| Polycystic ovary syndrome                                     | 0.9 (0.5 to 1.4)           | <b>-0.6 (-1.7 to 0.5)</b>        | 0.7 (0.2 to 1.1)           |
| Urinary incontinence                                          | 0.9 (0.4 to 1.3)           | 0.6 (-0.2 to 1.4)                | 0.9 (0.5 to 1.3)           |
| Uterine (womb) problems                                       | 1.1 (0.6 to 1.5)           | <b>-0.2 (-1.1 to 0.8)</b>        | 0.8 (0.4 to 1.2)           |
| Prostatic hypertrophy                                         | 1.1 (0.7 to 1.6)           | <b>-1.0 (-2.2 to 0.2)</b>        | 0.7 (0.3 to 1.2)           |
| Kidney or bladder stones                                      | 1.5 (1.1 to 2.0)           | 0.1 (-0.8 to 1.0)*               | 1.2 (0.8 to 1.6)           |
| Sexual dysfunction                                            | 2.0 (1.5 to 2.4)           | 2.3 (1.5 to 3.2)                 | 2.1 (1.7 to 2.5)           |
| Infertility                                                   | 2.7 (2.2 to 3.2)           | 2.8 (1.9 to 3.7)                 | 2.7 (2.3 to 3.1)           |
| <b>Skin disorders</b>                                         |                            |                                  |                            |
| Psoriasis                                                     | 0.4 (-0.05 to 0.9)*        | 0.8 (-0.009 to 1.6)              | 0.6 (0.2 to 1.0)           |
| Eczema                                                        | 1.6 (1.1 to 2.0)           | 1.3 (0.5 to 2.1)                 | 1.5 (1.2 to 1.9)           |
| Chronic urticarial                                            | 1.4 (0.9 to 1.8)           | 2.1 (1.3 to 2.9)                 | 1.6 (1.2 to 2.0)           |
| <b>Eye diseases</b>                                           |                            |                                  |                            |
| Vision impairment that cannot be corrected with glasses       | 0.05 (-0.5 to -0.6)*       | 0.3 (-0.6 to 1.1)*               | 0.1 (-0.3 to 0.6)*         |
| Glaucoma                                                      | 0.7 (0.2 to 1.1)           | 0.5 (-0.3 to 1.3)*               | 0.7 (0.3 to 1.1)           |
| Cataract                                                      | 1.0 (0.6 to 1.5)           | 1.4 (0.7 to 2.2)                 | 1.2 (0.8 to 1.6)           |
| <b>ENT disorders</b>                                          |                            |                                  |                            |
| Hearing impairment that cannot be corrected with hearing aids | 0.4 (-0.1 to -0.9)*        | 0.3 (-0.6 to 1.1)*               | 0.4 (-0.02 to 0.8)*        |
| Meniere's disease                                             | 0.6 (0.1 to 1.1)           | 0.4 (-0.4 to 1.3)*               | 0.5 (0.2 to 1.0)*          |
| Chronic sinusitis                                             | 1.6 (1.1 to 2.0)           | 1.8 (1.0 to 2.5)                 | 1.7 (1.3 to 2.0)           |
| <b>Oral disorders</b>                                         |                            |                                  |                            |
| Chronic gum disease                                           | 1.3 (0.9 to 1.7)           | 2.3 (1.4 to 3.1)                 | 2.0 (1.6 to 2.4)           |
| Edentulism                                                    | 1.9 (1.5 to 2.3)           | 2.4 (1.6 to 3.3)                 | 2.3 (1.9 to 2.7)           |
| <b>Congenital and chromosomal abnormalities</b>               | 0.5 (-0.003 to 1.0)*       | <b>-1.0 (-2.2 to 0.2)</b>        | 0.2 (-0.2 to 0.7)*         |
| <b>Risk factors/Symptoms/Behaviour</b>                        |                            |                                  |                            |
| Obesity                                                       | 1.0 (0.5 to 1.4)           | 1.0 (0.2 to 1.7)                 | 1.0 (0.6 to 1.4)           |
| Physical disability                                           | 1.5 (1.1 to 2.0)           | 0.3 (-0.6 to 1.1)*               | 1.3 (0.9 to 1.6)           |

|                               |                  |                  |                  |
|-------------------------------|------------------|------------------|------------------|
| Smoking                       | 2.5 (2.0 to 2.9) | 1.9 (1.1 to 2.7) | 2.4 (2.0 to 2.8) |
| Social deprivation or poverty | 2.5 (2.1 to 3.0) | 1.7 (0.9 to 2.5) | 2.4 (2.0 to 2.8) |
| Post-sepsis syndrome          | 2.8 (2.3 to 3.3) | 1.4 (0.5 to 2.2) | 2.5 (2.1 to 2.9) |
| Treatment burden              | 2.8 (2.4 to 3.3) | 1.5 (0.4 to 2.3) | 2.5 (2.2 to 2.9) |
| Dizziness                     | 2.9 (2.4 to 3.4) | 2.4 (1.6 to 3.3) | 2.9 (2.4 to 3.4) |
| Side effects of medicines     | 3.0 (2.5 to 3.4) | 1.5 (0.4 to 2.3) | 2.8 (2.4 to 3.2) |
| Chronic cough                 | 3.1 (2.6 to 3.6) | 2.3 (1.4 to 3.1) | 2.9 (2.5 to 3.3) |
| Sedentary lifestyle           | 3.8 (3.3 to 4.4) | 2.3 (1.4 to 3.1) | 3.4 (3.0 to 3.9) |

Lower difficulty parameter estimates indicate more frequent endorsement of items. Here we classified the numbers to three levels—  $\leq 0$  (in bold) indicates strongly endorsed, 0-0.5 indicates endorsed (\*), and  $>0.5$  indicates infrequently endorsed [5, 6]

## References

1. Boone, W.J., *Rasch Analysis for Instrument Development: Why, When, and How?* CBE life sciences education, 2016. **15**(4): p. 1-7.
2. Ptukhin, Y. and Y. Sheng, *Comparing two maximum likelihood algorithms for mixture Rasch models.* Behaviormetrika, 2019. **46**(1): p. 101-119.
3. Khine, M.S., *Rasch measurement applications in quantitative educational research.* 2020, Singapore: Springer.
4. Hagquist, C. and D. Andrich, *Recent advances in analysis of differential item functioning in health research using the Rasch model.* Health and Quality of Life Outcomes, 2017. **15**(181): p. 1-8.
5. Hays, R.D., L.S. Morales, and S.P. Reise, *Item response theory and health outcomes measurement in the 21st century.* Medical care, 2000. **38**(9): p. II28-II42.
6. Verhelst, N.D., *Item response theory*, in *Relating Language examinations to the Common European Framework of Reference for Languages: learning, teaching, assessment 2004*, Language Policy Division: Strasbourg.
